# Supplementary material for: A Single Regulator Mediates Strategic Switching between Attachment/Spread and Growth/Virulence in the Plant Pathogen Ralstonia solanacearum
Source: PubMed Central journal article supplement (PMC5615195; doi:10.1128/mbio.00895-17), 2017-09-26
Supplement: mbo005173501st1.pdf [file mbo005173501st1.pdf]

**Table S1**

**A: Complete list of *R. solanacearum* strain GMI1000 genes differentially expressed in planta with >2 fold-change and a false discovery rate (FDR)  $\leq$  0.005**

| Gene <sup>a</sup> | Fold change <sup>b</sup> | Adj.P. Value <sup>c</sup> | Locus_tag <sup>d</sup> | Annotation <sup>e</sup>                                                           |
|-------------------|--------------------------|---------------------------|------------------------|-----------------------------------------------------------------------------------|
| RSp1618           | 42.3                     | 2.09E-04                  | RS_RS24875             | transcriptional regulator                                                         |
| RSc1737           | 35.5                     | 4.50E-07                  | RS_RS08775             | porin                                                                             |
| RSp1468           | 24.3                     | 2.64E-06                  | RS_RS24195             | hypothetical protein                                                              |
| RSc2937           | 22.5                     | 1.71E-08                  | RS_RS14715             | iron ABC transporter substrate-binding protein                                    |
| RSc2938           | 20.9                     | 3.15E-09                  | RS_RS14720             | spermidine/putrescine ABC transporter permease                                    |
| RSc1750           | 18.2                     | 7.57E-08                  | RS_RS08840             | <i>livJ</i> ; branched-chain amino acid ABC transporter substrate-binding protein |
| RSp1459           | 17.8                     | 2.64E-06                  | RS_RS24150             | hypothetical protein                                                              |
| RSc2939           | 15.6                     | 4.91E-08                  | RS_RS14725             | lipase                                                                            |
| RSc2796           | 14.1                     | 3.55E-05                  | RS_RS13980             | hemagglutinin                                                                     |
| RSc1733           | 13.9                     | 4.91E-08                  | RS_RS08755             | spermidine/putrescine ABC transporter substrate-binding protein                   |
| RSp0287           | 11.5                     | 8.20E-07                  | RS_RS18540             | <i>hmsF</i> ; poly-beta-1,6-N-acetyl-D-glucosamine N-deacetylase PgaB             |
| RSp0286           | 10.1                     | 6.62E-07                  | RS_RS18535             | <i>hmsH</i> ; poly-beta-1,6 N-acetyl-D-glucosamine export porin PgaA              |
| RSc1832           | 10.0                     | 8.50E-06                  | RS_RS09240             | transcriptional regulator                                                         |
| RSp0243           | 10.0                     | 5.47E-05                  | RS_RS18325             | heme ABC transporter                                                              |
| RSc1082           | 9.8                      | 9.69E-06                  | RS_RS05375             | porin                                                                             |
| RSc0800           | 9.8                      | 1.40E-06                  | RS_RS04020             | ferrisiderophore receptor signal peptide protein                                  |
| RSp0285           | 9.5                      | 1.05E-05                  | RS_RS18530             | LuxR family transcriptional regulator                                             |
| RSc2797           | 9.4                      | 2.08E-03                  | RS_RS13985             | hemagglutinin                                                                     |
| RSp0055           | 9.3                      | 2.89E-04                  | RS_RS17460             | <i>glyA2</i> ; serine hydroxymethyltransferase                                    |
| RSp0056           | 8.8                      | 6.50E-05                  | RS_RS17465             | peptidase M19                                                                     |
| RSc2798           | 8.8                      | 8.58E-05                  | RS_RS13990             | hypothetical protein                                                              |
| RSp0795           | 8.5                      | 6.47E-07                  | RS_RS20915             | alpha/beta hydrolase                                                              |
| RSc1734           | 8.5                      | 5.24E-06                  | RS_RS08760             | Fe <sup>3+</sup> /spermidine/putrescine ABC transporter ATP-binding protein       |
| RSp0828           | 8.2                      | 9.85E-07                  | RS_RS21080             | <i>gudP</i> ; glucarate transporter                                               |
| RSp0054           | 8.0                      | 3.48E-05                  | RS_RS17455             | AraC family transcriptional regulator                                             |
| RSp1062           | 7.9                      | 7.77E-06                  | RS_RS22260             | TonB-dependent receptor                                                           |
| RSp0829           | 7.9                      | 1.14E-05                  | RS_RS21085             | <i>gudD2</i> ; glucarate dehydratase                                              |
| RSp1595           | 7.9                      | 5.36E-04                  | RS_RS24770             | 3-(3-hydroxy-phenyl)propionate transporter MhpT                                   |
| RSp0826           | 7.6                      | 1.21E-06                  | RS_RS21070             | 5-dehydro-4-deoxyglucarate dehydratase                                            |
| RSc1799           | 7.4                      | 5.39E-04                  | RS_RS09080             | branched-chain alpha-keto acid dehydrogenase subunit E2                           |
| RSc0801           | 7.3                      | 2.06E-06                  | RS_RS04025             | membrane protein                                                                  |
| RSp0227           | 7.2                      | 1.21E-05                  | RS_RS18245             | <i>fcs</i> ; feruloyl-CoA synthase                                                |
| RSp0064           | 7.2                      | 2.93E-05                  | RS_RS17505             | <i>opuC</i> ; glycine/betaine ABC transporter substrate-binding protein           |
| RSc1081           | 7.1                      | 1.05E-05                  | RS_RS05370             | alpha-glucosidase                                                                 |
| RSc0029           | 7.0                      | 1.06E-05                  | RS_RS00145             | <i>goaG</i> ; 4-aminobutyrate transaminase                                        |
| RSc1083           | 7.0                      | 1.76E-03                  | RS_RS05380             | aldose epimerase                                                                  |

|         |     |          |            |                                                                        |
|---------|-----|----------|------------|------------------------------------------------------------------------|
| RSc3127 | 6.9 | 5.19E-05 | RS_RS15710 | <i>eutB</i> ; ethanolamine ammonia lyase large subunit                 |
| RSc1736 | 6.7 | 2.91E-03 | RS_RS08770 | DNA-binding response regulator                                         |
| RSc1079 | 6.7 | 3.36E-07 | RS_RS05360 | <i>gudD1</i> ; glucarate dehydratase                                   |
| RSp0244 | 6.7 | 2.21E-05 | RS_RS18330 | membrane protein                                                       |
| RSc1751 | 6.4 | 1.45E-04 | RS_RS08845 | <i>livH1</i> ; ABC transporter permease                                |
| RSc0802 | 6.4 | 1.76E-06 | RS_RS04030 | membrane protein                                                       |
| RSc1749 | 6.4 | 1.32E-06 | RS_RS08835 | <i>alkK</i> ; long-chain-fatty-acid--CoA ligase                        |
| RSp0288 | 6.4 | 2.77E-05 | RS_RS18545 | <i>hmsR</i> ; poly-beta-1,6 N-acetyl-D-glucosamine synthase            |
| RSp1238 | 6.4 | 8.50E-04 | RS_RS23115 | polyisoprenoid-binding protein                                         |
| RSp0831 | 6.3 | 9.15E-06 | RS_RS21095 | NAD-dependent dehydratase                                              |
| RSp1619 | 6.2 | 2.35E-04 | RS_RS24880 | phosphoadenosine phosphosulfate sulfotransferase                       |
| RSc1080 | 6.1 | 4.96E-06 | RS_RS05365 | <i>exuT2</i> ; hexuronate transporter ExuT                             |
| RSp0274 | 6.1 | 4.45E-06 | RS_RS18475 | <i>ggt1</i> ; gamma-glutamyltransferase                                |
| RSp0830 | 5.9 | 4.96E-06 | RS_RS21090 | <i>garD</i> ; galactarate dehydratase                                  |
| RSp1098 | 5.7 | 1.40E-06 | RS_RS22420 | endonuclease                                                           |
| RSc0547 | 5.7 | 1.51E-05 | RS_RS02740 | MFS transporter                                                        |
| RSp0228 | 5.6 | 2.07E-05 | RS_RS18250 | sigma-54-dependent Fis family transcriptional regulator                |
| RSp0289 | 5.4 | 4.19E-05 | RS_RS18550 | hypothetical protein                                                   |
| RSp0827 | 5.3 | 3.91E-06 | RS_RS21075 | 2,5-dioxovalerate dehydrogenase                                        |
| RSc1732 | 5.3 | 1.07E-05 | RS_RS08750 | polyamine ABC transporter substrate-binding protein                    |
| RSc1202 | 5.2 | 6.08E-05 | RS_RS06020 | alkene reductase                                                       |
| RSc1754 | 5.2 | 3.76E-04 | RS_RS08860 | <i>livF</i> ; ABC transporter ATP-binding protein                      |
| RSp0972 | 5.2 | 4.53E-04 | RS_RS21805 | <i>nark1</i> ; MFS transporter                                         |
| RSc2725 | 5.1 | 7.49E-04 | RS_RS13635 | MarR family transcriptional regulator                                  |
| RSp0417 | 5.1 | 3.37E-05 | RS_RS19170 | <i>cysK2</i> ; siderophore biosynthesis protein SbnA                   |
| RSc1752 | 5.1 | 1.35E-04 | RS_RS08850 | <i>livM</i> ; ABC transporter permease                                 |
| RSc1245 | 5.0 | 2.13E-05 | RS_RS06240 | <i>ioll</i> ; protein implicated IN myo-inositol catabolite pathway    |
| RSc1239 | 5.0 | 8.30E-05 | RS_RS06210 | <i>iold</i> ; 3D-(3,5/4)-trihydroxycyclohexane-1,2-dione acylhydrolase |
| RSp1620 | 4.9 | 7.30E-04 | RS_RS24885 | hemagglutinin                                                          |
| RSc1241 | 4.9 | 4.30E-05 | RS_RS06220 | <i>mocB</i> ; rhizopine-binding protein                                |
| RSp0832 | 4.9 | 1.90E-04 | RS_RS21100 | gluconolactonase                                                       |
| RSc3051 | 4.9 | 4.86E-06 | RS_RS15330 | ABC transporter substrate-binding protein                              |
| RSc3342 | 4.8 | 6.67E-06 | RS_RS16745 | ABC transporter permease                                               |
| RSc1798 | 4.8 | 2.01E-03 | RS_RS09075 | 2-oxoisovalerate dehydrogenase subunit beta                            |
| RSc1295 | 4.8 | 2.64E-03 | RS_RS06490 | MarR family transcriptional regulator                                  |
| RSp0314 | 4.8 | 5.39E-04 | RS_RS18655 | DNA-binding response regulator                                         |
| RSc3341 | 4.8 | 3.17E-05 | RS_RS16740 | ABC transporter permease                                               |
| RSp0973 | 4.8 | 5.27E-04 | RS_RS21810 | <i>nark2</i> ; nitrate transporter                                     |
| RSc2238 | 4.7 | 6.10E-05 | RS_RS11235 | membrane protein                                                       |
| RSc2020 | 4.6 | 4.10E-05 | RS_RS10150 | acyl-CoA dehydrogenase                                                 |
| RSp0413 | 4.6 | 3.50E-03 | RS_RS19150 | transcriptional regulator                                              |

|         |     |          |            |                                                                        |
|---------|-----|----------|------------|------------------------------------------------------------------------|
| RSp0324 | 4.6 | 1.81E-03 | RS_RS18705 | (2Fe-2S)-binding protein                                               |
| RSc3343 | 4.6 | 3.82E-05 | RS_RS16750 | ABC transporter ATP-binding protein                                    |
| RSp1118 | 4.6 | 1.49E-04 | RS_RS22515 | hypothetical protein                                                   |
| RSc3139 | 4.6 | 9.06E-06 | RS_RS15770 | MarR family transcriptional regulator                                  |
| RSc1244 | 4.5 | 2.73E-05 | RS_RS06235 | <i>iolH</i> ; protein iolH                                             |
| RSc2542 | 4.5 | 2.21E-03 | RS_RS12745 | membrane protein                                                       |
| RSc2963 | 4.5 | 3.86E-04 | RS_RS14850 | hypothetical protein                                                   |
| RSp0081 | 4.4 | 2.37E-05 | RS_RS17580 | N-acetyltransferase GCN5                                               |
| RSp0814 | 4.4 | 1.75E-05 | RS_RS21010 | <i>mgo</i> ; malate:quinone oxidoreductase                             |
| RSc0627 | 4.3 | 8.87E-05 | RS_RS03150 | aldehyde oxidase                                                       |
| RSp0403 | 4.3 | 2.86E-04 | RS_RS19095 | hypothetical protein                                                   |
| RSp1117 | 4.3 | 8.64E-05 | RS_RS22510 | hypothetical protein                                                   |
| RSp1389 | 4.3 | 3.02E-03 | RS_RS23825 | MBL fold metallo-hydrolase                                             |
| RSc1203 | 4.3 | 9.06E-06 | RS_RS06025 | NADPH:quinone oxidoreductase                                           |
| RSc0593 | 4.3 | 1.38E-04 | RS_RS02970 | hypothetical protein                                                   |
| RSc1242 | 4.3 | 1.51E-04 | RS_RS06225 | D-ribose transporter ATP-binding protein                               |
| RSc3047 | 4.3 | 1.63E-04 | RS_RS15310 | ABC transporter ATP-binding protein                                    |
| RSp1458 | 4.3 | 1.63E-04 | RS_RS24145 | transporter protein                                                    |
| RSc1246 | 4.2 | 5.36E-05 | RS_RS06245 | <i>iolG</i> ; inositol 2-dehydrogenase                                 |
| RSp0316 | 4.2 | 4.57E-04 | RS_RS18665 | 2-nitropropane dioxygenase                                             |
| RSc0628 | 4.2 | 4.63E-04 | RS_RS03155 | lipoprotein                                                            |
| RSp0226 | 4.2 | 3.33E-05 | RS_RS18240 | <i>vdh</i> ; salicylaldehyde dehydrogenase                             |
| RSp0422 | 4.2 | 4.52E-04 | RS_RS19195 | siderophore biosynthesis protein                                       |
| RSc1753 | 4.2 | 8.63E-04 | RS_RS08855 | <i>livG</i> ; ABC transporter ATP-binding protein                      |
| RSc1972 | 4.2 | 5.46E-05 | RS_RS09910 | <i>phaP</i> ; phasin                                                   |
| RSc1622 | 4.2 | 3.81E-03 | RS_RS08175 | hypothetical protein                                                   |
| RSc3344 | 4.1 | 3.86E-05 | RS_RS16755 | ABC transporter ATP-binding protein                                    |
| RSc2044 | 4.1 | 1.63E-04 | RS_RS10255 | acyl-CoA dehydrogenase                                                 |
| RSp0976 | 4.1 | 4.14E-04 | RS_RS21825 | <i>narJ</i> ; nitrate reductase molybdenum cofactor assembly chaperone |
| RSc1247 | 4.1 | 2.69E-05 | RS_RS06250 | myo-inositol catabolism protein                                        |
| RSp1119 | 4.1 | 4.95E-04 | RS_RS22520 | transcriptional regulator                                              |
| RSc1084 | 4.0 | 5.54E-04 | RS_RS05385 | membrane protein                                                       |
| RSc1812 | 4.0 | 2.82E-03 | RS_RS09145 | hypothetical protein                                                   |
| RSp0421 | 4.0 | 1.02E-04 | RS_RS19190 | siderophore biosynthesis protein                                       |
| RSp1614 | 4.0 | 1.00E-03 | RS_RS24855 | membrane protein                                                       |
| RSc1469 | 4.0 | 1.28E-03 | RS_RS07395 | carbon monoxide dehydrogenase                                          |
| RSc1262 | 3.9 | 1.77E-04 | RS_RS06325 | hypothetical protein                                                   |
| RSc1236 | 3.9 | 4.00E-04 | RS_RS06195 | membrane protein                                                       |
| RSp0321 | 3.9 | 8.89E-04 | RS_RS18690 | hypothetical protein                                                   |
| RSp0420 | 3.9 | 1.37E-03 | RS_RS19185 | membrane protein                                                       |
| RSc0159 | 3.9 | 5.46E-05 | RS_RS00785 | ornithine--oxo-acid transaminase                                       |

|          |     |          |            |                                                                              |
|----------|-----|----------|------------|------------------------------------------------------------------------------|
| RSp0053  | 3.9 | 7.89E-04 | RS_RS17450 | <i>fdhA</i> ; formaldehyde dehydrogenase, glutathione-independent            |
| RSc2012  | 3.8 | 3.59E-05 | RS_RS10110 | <i>gstH</i> ; glutathione S-transferase                                      |
| RSc1762  | 3.8 | 4.33E-04 | RS_RS08900 | acyl-CoA dehydrogenase                                                       |
| RSp0796  | 3.8 | 8.29E-04 | RS_RS20920 | transcription regulator protein                                              |
| RSp0418  | 3.8 | 2.98E-05 | RS_RS19175 | 2,3-diaminopropionate biosynthesis protein SbnB                              |
| RSp0484  | 3.8 | 3.35E-05 | RS_RS19485 | hypothetical protein                                                         |
| RSc1337  | 3.8 | 8.01E-04 | RS_RS06705 | FMN reductase (NADPH)                                                        |
| RSp0082  | 3.8 | 1.28E-03 | RS_RS17585 | hypothetical protein                                                         |
| RSp0080  | 3.8 | 1.29E-04 | RS_RS17575 | HxlR family transcriptional regulator                                        |
| RSc0626  | 3.8 | 1.13E-03 | RS_RS03145 | (2Fe-2S)-binding protein                                                     |
| RSc1811  | 3.7 | 4.33E-04 | RS_RS09140 | short-chain isoprenyl diphosphate synthase                                   |
| RSc1243  | 3.7 | 1.45E-04 | RS_RS06230 | sugar ABC transporter permease                                               |
| RSc1380  | 3.7 | 1.36E-04 | RS_RS06920 | <i>gsiB</i> ; glutathione ABC transporter substrate-binding protein          |
| RSc1759  | 3.7 | 9.70E-06 | RS_RS08885 | 3-hydroxyacyl-CoA dehydrogenase                                              |
| RSp1615  | 3.7 | 2.87E-03 | RS_RS24860 | <i>uxaA</i> ; galactarate dehydratase                                        |
| RSp0225  | 3.7 | 5.39E-04 | RS_RS18235 | <i>fca</i> ; crotonase                                                       |
| RSc0028  | 3.7 | 1.54E-04 | RS_RS00140 | <i>gabDI</i> ; NAD-dependent succinate-semialdehyde dehydrogenase            |
| RSp1396  | 3.7 | 1.15E-03 | RS_RS23860 | membrane protein                                                             |
| RSc1264  | 3.7 | 2.93E-05 | RS_RS06335 | <i>ugpB</i> ; glycerol-3-phosphate ABC transporter substrate-binding protein |
| RSc1248  | 3.6 | 3.94E-05 | RS_RS06255 | oxidoreductase                                                               |
| RSp0974  | 3.6 | 2.51E-03 | RS_RS21815 | <i>narG</i> ; nitrate reductase subunit alpha                                |
| rRNA-23S | 3.6 | 3.50E-03 | RS_RS15270 | 23S ribosomal RNA                                                            |
| RSp0424  | 3.6 | 1.75E-04 | RS_RS19205 | diaminopimelate decarboxylase                                                |
| rRNA-23S | 3.6 | 2.43E-03 | RS_RS14365 | 23S ribosomal RNA                                                            |
| RSc1240  | 3.6 | 2.89E-04 | RS_RS06215 | <i>iolC</i> ; 5-dehydro-2-deoxygluconokinase                                 |
| RSc1340  | 3.6 | 2.13E-03 | RS_RS06720 | <i>ssuC</i> ; sulfonate ABC transporter                                      |
| RSp1592  | 3.6 | 5.71E-05 | RS_RS24755 | <i>livK</i> ; branched chain amino acid ABC transporter substrate-binding    |
| RSc1339  | 3.5 | 1.12E-03 | RS_RS06715 | <i>ssuD</i> ; alkanesulfonate monooxygenase                                  |
| RSc0624  | 3.5 | 1.86E-03 | RS_RS03135 | IMP dehydrogenase                                                            |
| RSc1336  | 3.5 | 9.36E-05 | RS_RS06700 | <i>sbp</i> ; ABC transporter permease                                        |
| RSc2043  | 3.5 | 7.80E-04 | RS_RS10250 | MaoC family dehydratase                                                      |
| RSc2045  | 3.4 | 6.08E-05 | RS_RS10260 | acyl-CoA dehydrogenase                                                       |
| RSc3059  | 3.4 | 8.50E-06 | RS_RS15370 | MFS transporter                                                              |
| RSc0297  | 3.4 | 1.62E-03 | RS_RS01460 | hypothetical protein                                                         |
| RSp0414  | 3.4 | 2.43E-04 | RS_RS19155 | ferric siderophore receptor protein                                          |
| RSp0481  | 3.4 | 2.79E-04 | RS_RS19470 | ABC transporter substrate-binding protein                                    |
| RSc3128  | 3.4 | 6.64E-05 | RS_RS15715 | <i>exaC</i> ; aldehyde dehydrogenase                                         |
| RSp1122  | 3.4 | 6.08E-05 | RS_RS22535 | hydrolase                                                                    |
| RSc1267  | 3.4 | 1.65E-03 | RS_RS06350 | <i>upgC</i> ; sn-glycerol-3-phosphate import ATP-binding protein UgpC        |
| rRNA-16S | 3.3 | 2.21E-03 | RS_RS14380 | 16S ribosomal RNA                                                            |
| RSp0315  | 3.3 | 1.63E-04 | RS_RS18660 | two-component sensor histidine kinase                                        |

|         |     |          |            |                                                                 |
|---------|-----|----------|------------|-----------------------------------------------------------------|
| RSc1761 | 3.3 | 3.12E-04 | RS_RS08895 | acetyl-CoA acetyltransferase                                    |
| RSp0975 | 3.3 | 4.47E-03 | RS_RS21820 | <i>narH</i> ; nitrate reductase subunit beta                    |
| RSc1381 | 3.3 | 2.64E-03 | RS_RS06925 | <i>gsiC</i> ; glutathione ABC transporter permease GsiC         |
| RSc2253 | 3.3 | 1.02E-04 | RS_RS11310 | <i>pcaJ</i> ; 3-oxoadipate CoA-transferase subunit B            |
| RSc1266 | 3.3 | 2.21E-03 | RS_RS06345 | <i>ugpE</i> ; glycerol-3-phosphate transporter membrane protein |
| RSp0977 | 3.3 | 6.62E-04 | RS_RS21830 | <i>narI</i> ; nitrate reductase                                 |
| RSp0996 | 3.2 | 2.25E-03 | RS_RS21930 | <i>ttuC2</i> ; tartrate dehydrogenase                           |
| RSc2376 | 3.2 | 4.04E-03 | RS_RS11930 | 4Fe-4S ferredoxin                                               |
| RSc1697 | 3.2 | 3.23E-04 | RS_RS08570 | DNA repair protein HhH-GPD                                      |
| RSc0780 | 3.2 | 5.53E-04 | RS_RS03920 | <i>fadD2</i> ; long-chain-fatty-acid--CoA ligase                |
| RSp0051 | 3.2 | 2.12E-03 | RS_RS17440 | porin                                                           |
| RSp1120 | 3.2 | 3.64E-03 | RS_RS22525 | hypothetical protein                                            |
| RSc0473 | 3.2 | 1.87E-04 | RS_RS02345 | acyl-CoA dehydrogenase                                          |
| RSc0484 | 3.2 | 3.61E-05 | RS_RS02400 | <i>gltL</i> ; arginine ABC transporter ATP-binding protein      |
| RSc1763 | 3.2 | 3.64E-04 | RS_RS08905 | gluconate 2-dehydrogenase                                       |
| RSc2254 | 3.2 | 1.15E-03 | RS_RS11315 | <i>pcaI</i> ; 3-oxoadipate CoA-transferase subunit A            |
| RSp1159 | 3.1 | 3.77E-04 | RS_RS22720 | universal stress protein UspA                                   |
| RSc1265 | 3.1 | 6.72E-04 | RS_RS06340 | <i>ugpA</i> ; glycerol-3-phosphate transporter permease         |
| RSc0481 | 3.1 | 2.41E-04 | RS_RS02385 | ABC transporter                                                 |
| RSc2799 | 3.1 | 3.51E-03 | RS_RS13995 | membrane protein                                                |
| RSp0419 | 3.1 | 2.66E-03 | RS_RS19180 | siderophore biosynthesis protein                                |
| RSc1238 | 3.1 | 1.43E-04 | RS_RS06205 | <i>iolE</i> ; myo-inosose-2 dehydratase                         |
| RSc3048 | 3.1 | 2.13E-03 | RS_RS15315 | ABC transporter permease                                        |
| RSc1463 | 3.1 | 1.28E-03 | RS_RS07365 | hypothetical protein                                            |
| RSp0107 | 3.1 | 2.29E-04 | RS_RS17665 | MFS transporter                                                 |
| RSc1731 | 3.1 | 4.80E-04 | RS_RS08745 | polyamine ABC transporter permease                              |
| RSp1591 | 3.0 | 1.28E-03 | RS_RS24750 | aldehyde dehydrogenase                                          |
| RSc3270 | 3.0 | 4.73E-03 | RS_RS16380 | hypothetical protein                                            |
| RSc1442 | 3.0 | 7.05E-04 | RS_RS07260 | <i>pcaG</i> ; protocatechuate 3,4-dioxygenase subunit alpha     |
| RSc3075 | 3.0 | 3.65E-03 | NA         | NA                                                              |
| RSp1047 | 3.0 | 2.12E-03 | RS_RS22185 | MFS transporter                                                 |
| RSp0048 | 2.9 | 7.30E-04 | RS_RS17425 | <i>soxA1</i> ; sarcosine oxidase subunit alpha                  |
| RSc1201 | 2.9 | 7.55E-05 | RS_RS06015 | TetR family transcriptional regulator                           |
| RSc1769 | 2.9 | 4.68E-03 | RS_RS08935 | hypothetical protein                                            |
| RSc2431 | 2.9 | 4.59E-04 | RS_RS12205 | chloride channel protein                                        |
| RSc0476 | 2.9 | 5.22E-04 | RS_RS02360 | enoyl-CoA hydratase                                             |
| RSc2095 | 2.9 | 3.64E-03 | RS_RS10510 | <i>xdhA</i> ; xanthine dehydrogenase small subunit              |
| RSp0273 | 2.9 | 1.49E-03 | RS_RS18465 | glutamate carboxypeptidase                                      |
| RSc2042 | 2.9 | 9.40E-04 | RS_RS10245 | MaoC family dehydratase                                         |
| RSc0746 | 2.8 | 2.44E-03 | RS_RS03760 | <i>tauD</i> ; taurine dioxygenase                               |
| RSc1562 | 2.8 | 2.83E-03 | RS_RS07865 | O-acetylhomoserine aminocarboxypropyltransferase                |

|         |     |          |            |                                                                                                                              |
|---------|-----|----------|------------|------------------------------------------------------------------------------------------------------------------------------|
| RSc2046 | 2.8 | 4.48E-04 | RS_RS10265 | hypothetical protein                                                                                                         |
| RSp1623 | 2.8 | 1.44E-03 | RS_RS24900 | histidine kinase                                                                                                             |
| RSp0320 | 2.8 | 1.37E-03 | RS_RS18685 | Cd(II)/Pb(II)-responsive transcriptional regulator                                                                           |
| RSc1760 | 2.8 | 1.13E-03 | RS_RS08890 | <i>pncA</i> ; bifunctional pyrazinamidase/nicotinamidase hydrolase                                                           |
| RSc2647 | 2.7 | 8.94E-04 | RS_RS13255 | <i>hutU</i> ; urocanate hydratase                                                                                            |
| RSc3045 | 2.7 | 7.92E-04 | RS_RS15300 | <i>glpD</i> ; glycerol-3-phosphate dehydrogenase                                                                             |
| RSc1468 | 2.7 | 2.15E-03 | RS_RS07390 | carbon monoxide dehydrogenase                                                                                                |
| RSc0474 | 2.7 | 1.38E-04 | RS_RS02350 | 3-hydroxyacyl-CoA dehydrogenase                                                                                              |
| RSc0483 | 2.7 | 9.33E-05 | RS_RS02395 | <i>gltK</i> ; glutamate/aspartate transporter permease GltK                                                                  |
| RSp0850 | 2.7 | 3.10E-03 | RS_RS21195 | <i>prhR</i> ; iron dicitrate transporter FecR                                                                                |
| RSc3329 | 2.7 | 3.88E-04 | RS_RS16680 | branched-chain amino acid ABC transporter substrate-binding protein                                                          |
| RSc2151 | 2.6 | 1.78E-03 | RS_RS10785 | hypothetical protein                                                                                                         |
| RSp0849 | 2.6 | 9.70E-04 | RS_RS21190 | <i>prhI</i> ; RNA polymerase sigma factor                                                                                    |
| RSp0530 | 2.6 | 4.33E-04 | RS_RS19710 | cytochrome-c peroxidase                                                                                                      |
| RSc2257 | 2.6 | 7.59E-05 | RS_RS11330 | amino acid ABC transporter substrate-binding protein                                                                         |
| RSc0475 | 2.6 | 3.63E-04 | RS_RS02355 | acetyl-CoA acetyltransferase                                                                                                 |
| RSp0483 | 2.6 | 2.13E-03 | RS_RS19480 | ornithine cyclodeaminase                                                                                                     |
| RSc0482 | 2.5 | 3.04E-04 | RS_RS02390 | <i>gltJ</i> ; glutamate/aspartate ABC transporter permease GltJ                                                              |
| RSc1975 | 2.5 | 1.00E-03 | RS_RS09925 | multidrug ABC transporter permease                                                                                           |
| RSc2353 | 2.5 | 2.68E-03 | RS_RS11815 | hypothetical protein                                                                                                         |
| RSp1113 | 2.5 | 9.14E-04 | RS_RS22490 | multidrug efflux RND transporter permease subunit                                                                            |
| RSc2021 | 2.5 | 2.93E-04 | RS_RS10155 | thiol:disulfide oxidoreductase                                                                                               |
| RSp1670 | 2.5 | 4.06E-03 | RS_RS25115 | hypothetical protein                                                                                                         |
| RSc2014 | 2.5 | 4.69E-03 | RS_RS10120 | <i>paaG2</i> ; enoyl-CoA hydratase                                                                                           |
| RSp1590 | 2.5 | 1.24E-03 | RS_RS24745 | FAD-dependent oxidoreductase                                                                                                 |
| RSp0242 | 2.5 | 3.81E-03 | RS_RS18320 | <i>glgA</i> ; glycogen synthase                                                                                              |
| RSc3392 | 2.5 | 3.45E-03 | RS_RS16995 | DNA-binding response regulator                                                                                               |
| RSc0981 | 2.5 | 5.64E-04 | RS_RS04855 | <i>lldP</i> ; lactate permease                                                                                               |
| RSc1293 | 2.4 | 3.86E-03 | RS_RS06480 | <i>emrA</i> ; hemolysin D                                                                                                    |
| RSc1567 | 2.4 | 5.18E-04 | RS_RS07890 | dehydrogenase                                                                                                                |
| RSp0079 | 2.4 | 3.73E-03 | RS_RS17570 | GntR family transcriptional regulator                                                                                        |
| RSc1342 | 2.3 | 3.04E-03 | RS_RS06730 | <i>ssuF</i> ; transporter                                                                                                    |
| RSp0993 | 2.3 | 4.00E-03 | RS_RS21915 | membrane protein                                                                                                             |
| RSc3386 | 2.3 | 3.01E-03 | NA         | NA                                                                                                                           |
| RSc1316 | 2.2 | 1.89E-03 | RS_RS06600 | phosphate starvation protein PhoH                                                                                            |
| RSc1014 | 2.2 | 7.63E-04 | RS_RS05020 | LacI family transcriptional regulator                                                                                        |
| RSc2512 | 2.2 | 1.93E-03 | RS_RS12595 | arogenate dehydratase                                                                                                        |
| RSc0010 | 2.2 | 5.88E-04 | RS_RS00045 | <i>acrB</i> ; multidrug efflux RND transporter permease subunit<br>metE 5-methyltetrahydropteroyltriglutamate-- homocysteine |
| RSp0676 | 2.2 | 1.94E-03 | RS_RS20360 | methyltransferase                                                                                                            |
| RSc2244 | 2.2 | 4.02E-03 | RS_RS11265 | ABC transporter substrate-binding protein                                                                                    |
| RSc1008 | 2.2 | 4.43E-04 | RS_RS04990 | <i>phaZ</i> ; esterase                                                                                                       |

|         |     |          |            |                                                         |
|---------|-----|----------|------------|---------------------------------------------------------|
| RSp1048 | 2.2 | 8.49E-04 | RS_RS22190 | formate dehydrogenase oxidoreduct                       |
| RSc2041 | 2.2 | 3.15E-03 | RS_RS10240 | urea ABC transporter substrate-binding protein          |
| RSc2422 | 2.1 | 3.53E-03 | RS_RS12155 | <i>cysD</i> ; sulfate adenylyltransferase small subunit |
| RSp1308 | 2.1 | 3.74E-03 | RS_RS23460 | carboxymethylenebutenolidase                            |
| RSc2425 | 2.1 | 3.30E-03 | RS_RS12170 | <i>cysII</i> ; sulfite reductase                        |
| RSc0074 | 2.1 | 4.00E-03 | RS_RS00370 | <i>htpX</i> ; protease HtpX homolog                     |
| RSc1766 | 2.1 | 3.21E-03 | RS_RS08920 | NADP-dependent oxidoreductase                           |
| RSc1563 | 2.1 | 2.84E-03 | RS_RS07870 | CBS domain-containing protein                           |
| RSc1231 | 2.1 | 6.47E-04 | RS_RS06170 | <i>tal</i> ; transaldolase                              |
| RSc0472 | 2.1 | 4.47E-03 | RS_RS02340 | TetR family transcriptional regulator                   |
| RSp0013 | 2.0 | 3.19E-03 | RS_RS17260 | amino acid ABC transporter substrate-binding protein    |
| RSc0009 | 2.0 | 4.11E-03 | RS_RS00040 | multidrug transporter                                   |
| RSp0416 | 2.0 | 2.83E-03 | RS_RS19165 | membrane protein                                        |
| RSc2421 | 2.0 | 3.60E-03 | RS_RS12150 | <i>cysN</i> ; sulfate adenylyltransferase               |

Downregulated genes

| Gene <sup>a</sup> | Fold change <sup>b</sup> | Adj.P. Value <sup>c</sup> | Locus_tag <sup>d</sup> | Annotation <sup>e</sup>                                               |
|-------------------|--------------------------|---------------------------|------------------------|-----------------------------------------------------------------------|
| RSc1727           | -261.9                   | 1.55E-06                  | RS_RS08725             | hypothetical protein                                                  |
| RSp0583           | -228.6                   | 2.42E-09                  | NA                     | NA                                                                    |
| RSp1021           | -226.3                   | 2.64E-06                  | NA                     | NA                                                                    |
| RSc1728           | -224.3                   | 2.80E-05                  | RS_RS08730             | radical SAM/SPASM maturase                                            |
| RSp1016           | -203.1                   | 2.48E-07                  | RS_RS22025             | <i>wecC</i> ; NDP-N-acetyl-D-galactosaminuronic acid dehydrogenase    |
| RSp1002           | -200.3                   | 1.51E-09                  | RS_RS21955             | <i>tek</i> ; TEK signal peptide protein                               |
| RSc2107           | -192.3                   | 2.62E-08                  | RS_RS10570             | hypothetical protein                                                  |
| RSp0169           | -171.1                   | 3.15E-09                  | RS_RS17960             | membrane protein                                                      |
| RSc1723           | -160.5                   | 4.96E-06                  | NA                     | NA                                                                    |
| RSp0569           | -129.1                   | 2.55E-07                  | NA                     | NA                                                                    |
| RSp1014           | -122.8                   | 4.96E-06                  | RS_RS22015             | <i>epsF</i> ; EPS I polysaccharide export inner membrane protein EpsF |
| RSp1020           | -113.0                   | 3.36E-07                  | RS_RS22045             | <i>epsA</i> ; EPS I polysaccharide export outer membrane protein EpsA |
| RSp1015           | -112.3                   | 4.26E-06                  | RS_RS22020             | <i>epsE</i> ; EPS I polysaccharide export inner membrane protein EpsE |
| RSp0982           | -108.9                   | 1.91E-05                  | RS_RS21855             | hypothetical protein                                                  |
| RSp1018           | -101.7                   | 8.62E-08                  | RS_RS22035             | <i>epsB</i> ; tyrosine protein kinase                                 |
| RSp1003           | -99.6                    | 7.57E-08                  | RS_RS21960             | <i>xpsR</i> ; transcriptional regulator                               |
| RSp1019           | -98.9                    | 2.80E-05                  | RS_RS22040             | <i>epsP</i> ; protein-tyrosine-phosphatase                            |
| RSc1725           | -92.0                    | 6.47E-07                  | RS_RS08715             | hypothetical protein                                                  |
| RSp1010           | -90.9                    | 1.21E-06                  | RS_RS21995             | hypothetical protein                                                  |
| RSp0162           | -90.5                    | 4.00E-07                  | RS_RS17915             | <i>egl</i> ; drug:proton antiporter                                   |
| RSp1017           | -89.3                    | 1.34E-06                  | RS_RS22030             | <i>epsC</i> ; UDP-N-acetyl glucosamine 2-epimerase                    |
| RSc0232           | -86.6                    | 2.92E-06                  | RS_RS01140             | hypothetical protein                                                  |
| RSp1091           | -81.1                    | 9.64E-06                  | RS_RS22385             | <i>cpaA2</i> ; peptidase                                              |
| RSp1090           | -78.8                    | 1.85E-05                  | RS_RS22380             | pilus biosynthesis protein TadE                                       |

|         |       |          |            |                                      |
|---------|-------|----------|------------|--------------------------------------|
| RSp1009 | -74.3 | 1.65E-06 | RS_RS21990 | glycosyltransferase WbuB             |
| RSc2026 | -73.1 | 1.13E-05 | NA         | NA                                   |
| RSp1004 | -71.0 | 5.04E-07 | RS_RS21965 | dTDP-glucose 4,6-dehydratase         |
| RSc3288 | -69.7 | 2.48E-07 | RS_RS16475 | sugar-binding lectin protein         |
| RSc0025 | -69.5 | 1.16E-07 | RS_RS00125 | hypothetical protein                 |
| RSp0174 | -67.4 | 2.14E-06 | RS_RS17980 | methyltransferase                    |
| RSp1417 | -66.9 | 1.33E-06 | RS_RS23960 | MFS transporter                      |
| RSc1726 | -63.6 | 2.48E-07 | RS_RS08720 | hypothetical protein                 |
| RSp1013 | -60.6 | 6.83E-07 | RS_RS22010 | transferase                          |
| RSc1910 | -58.5 | 5.65E-05 | NA         | NA                                   |
| RSc2508 | -57.0 | 2.64E-08 | RS_RS12575 | toxin HipA                           |
| RSp0173 | -54.5 | 5.54E-06 | RS_RS17975 | NIFS-like protein                    |
| RSp1434 | -50.3 | 1.09E-05 | RS_RS24040 | amino acid adenylation protein       |
| RSp1011 | -47.9 | 4.59E-07 | RS_RS22000 | dehydrogenase                        |
| RSp1493 | -46.6 | 6.96E-05 | NA         | NA                                   |
| RSp1005 | -42.0 | 1.80E-06 | RS_RS21970 | membrane protein                     |
| RSc3292 | -41.4 | 7.15E-05 | RS_RS16495 | membrane protein                     |
| RSp0999 | -40.2 | 1.04E-04 | NA         | NA                                   |
| RSp1087 | -39.7 | 2.21E-05 | RS_RS22365 | membrane protein                     |
| RSp0602 | -37.9 | 2.64E-08 | RS_RS19995 | hypothetical protein                 |
| RSp0603 | -37.7 | 4.91E-08 | RS_RS20000 | serine protease                      |
| RSp1092 | -37.7 | 2.21E-05 | RS_RS22390 | pilus assembly protein               |
| RSp1492 | -36.4 | 9.30E-06 | RS_RS24315 | hypothetical protein                 |
| RSp1422 | -36.1 | 6.03E-05 | RS_RS23980 | non-ribosomal peptide synthetase     |
| RSc2025 | -35.9 | 6.44E-07 | RS_RS10175 | hypothetical protein                 |
| RSp1603 | -35.5 | 3.08E-04 | RS_RS24800 | calcium-binding ef-hand hnh nuclease |
| RSc2027 | -35.1 | 1.72E-05 | NA         | NA                                   |
| RSp1437 | -33.4 | 1.45E-04 | RS_RS25215 | hypothetical protein                 |
| RSp1654 | -33.2 | 1.95E-06 | RS_RS25045 | hypothetical protein                 |
| RSp0743 | -33.2 | 1.16E-05 | RS_RS20670 | type VI secretion protein            |
| RSp1430 | -32.9 | 3.94E-05 | RS_RS24020 | hypothetical protein                 |
| RSp0501 | -32.6 | 3.04E-05 | RS_RS19570 | hypothetical protein                 |
| RSp1263 | -32.4 | 3.62E-07 | RS_RS23235 | <i>nadB2</i> ; L-aspartate oxidase   |
| RSc0582 | -32.2 | 2.80E-05 | RS_RS02915 | avrD-related protein                 |
| RSp1419 | -31.7 | 1.45E-07 | RS_RS23970 | peptide synthetase                   |
| RSp1527 | -31.5 | 1.26E-04 | RS_RS24485 | membrane protein                     |
| RSp1436 | -31.3 | 3.51E-05 | RS_RS24050 | acetyltransferase                    |
| RSp1418 | -31.1 | 1.82E-06 | RS_RS23965 | hydrolase                            |
| RSp1486 | -30.8 | 1.34E-06 | RS_RS24290 | hypothetical protein                 |
| RSp1012 | -29.7 | 2.80E-05 | RS_RS22005 | acyltransferase                      |
| RSp0172 | -29.2 | 5.24E-06 | RS_RS17970 | hypothetical protein                 |

|         |       |          |            |                                                                   |
|---------|-------|----------|------------|-------------------------------------------------------------------|
| RSp1023 | -29.1 | 7.55E-06 | RS_RS22060 | hypothetical protein                                              |
| RSp0532 | -28.6 | 5.54E-06 | RS_RS19720 | peptidase M1                                                      |
| RSp1656 | -28.5 | 2.66E-04 | RS_RS25055 | ferritin                                                          |
| RSp0779 | -28.1 | 6.30E-05 | RS_RS20835 | N-acylhomoserine lactone synthase                                 |
| RSp0957 | -26.6 | 1.75E-05 | RS_RS21730 | hypothetical protein                                              |
| RSc2024 | -26.3 | 6.08E-05 | RS_RS10170 | amino acid transporter                                            |
| RSp1075 | -25.1 | 1.55E-05 | RS_RS22305 | membrane protein                                                  |
| RSp1138 | -25.1 | 3.09E-04 | RS_RS22610 | hypothetical protein                                              |
| RSp0745 | -25.0 | 3.36E-07 | RS_RS20680 | hypothetical protein                                              |
| RSp0924 | -24.2 | 4.35E-06 | RS_RS21540 | hypothetical protein                                              |
| RSc2758 | -23.9 | 1.07E-04 | RS_RS13800 | <i>araF</i> ; arabinose ABC transporter substrate-binding protein |
| RSp1085 | -23.7 | 7.05E-05 | RS_RS22355 | <i>cpaF2</i> ; pilus assembly protein CpaF                        |
| RSp1000 | -23.5 | 2.49E-07 | RS_RS21945 | <i>tek2</i> ; TEK signal peptide protein                          |
| RSp0640 | -23.3 | 1.99E-04 | NA         | NA                                                                |
| RSp0198 | -23.1 | 4.19E-05 | NA         | NA                                                                |
| RSp1602 | -22.9 | 3.13E-04 | NA         | NA                                                                |
| RSp0781 | -22.4 | 1.13E-05 | RS_RS20845 | <i>metB</i> ; cystathionine gamma-synthase                        |
| RSp0767 | -22.3 | 3.18E-04 | RS_RS20790 | membrane protein                                                  |
| RSp0747 | -21.9 | 1.07E-05 | RS_RS20690 | type VI secretion protein                                         |
| RSp1487 | -21.8 | 1.45E-07 | RS_RS24295 | <i>cmcH</i> ; proline dehydrogenase                               |
| RSp1438 | -21.7 | 4.33E-04 | RS_RS24060 | methionine--tRNA ligase                                           |
| RSp1001 | -21.6 | 2.46E-06 | RS_RS21950 | hypothetical protein                                              |
| RSc3287 | -21.4 | 9.00E-06 | RS_RS16470 | <i>solR</i> ; transcriptional activator protein SolR              |
| RSp1526 | -20.8 | 3.32E-05 | RS_RS24480 | hypothetical protein                                              |
| RSc0094 | -20.7 | 8.50E-04 | RS_RS00475 | membrane protein                                                  |
| RSp1529 | -20.6 | 2.37E-05 | RS_RS24495 | 2-oxoglutarate-dependent ethylene/succinate-forming enzyme        |
| RSp1424 | -20.5 | 1.02E-04 | RS_RS23990 | <i>ectB</i> ; diamino butyrate--2-oxoglutarate transaminase       |
| RSc1817 | -20.2 | 4.65E-06 | RS_RS09165 | siderophore biosynthesis protein                                  |
| RSp1429 | -20.1 | 1.29E-04 | RS_RS24015 | hypothetical protein                                              |
| RSp0742 | -20.1 | 4.90E-06 | RS_RS20665 | hypothetical protein                                              |
| RSp0746 | -19.9 | 6.08E-05 | RS_RS20685 | type VI secretion protein                                         |
| RSp0170 | -19.7 | 1.01E-05 | NA         | NA                                                                |
| RSp0727 | -19.6 | 1.28E-03 | RS_RS20600 | XRE family transcriptional regulator                              |
| RSp1086 | -19.5 | 5.28E-04 | RS_RS22360 | <i>cpaE2</i> ; pilus assembly protein                             |
| RSp1428 | -19.5 | 1.60E-05 | RS_RS24010 | rhodanese                                                         |
| RSp1440 | -19.5 | 4.24E-04 | NA         | NA                                                                |
| RSc1908 | -19.5 | 2.21E-05 | RS_RS09625 | hypothetical protein                                              |
| RSc2509 | -19.4 | 2.01E-06 | RS_RS12580 | hypothetical protein                                              |
| RSp1416 | -19.3 | 3.92E-05 | RS_RS23955 | membrane protein                                                  |
| RSp1425 | -19.3 | 3.26E-05 | RS_RS23995 | <i>pvdA</i> ; ornithine monooxygenase                             |
| RSp0741 | -19.1 | 1.14E-03 | RS_RS20660 | membrane protein                                                  |

|           |       |          |            |                                                         |
|-----------|-------|----------|------------|---------------------------------------------------------|
| RSp0261   | -18.9 | 8.50E-06 | RS_RS18415 | membrane protein                                        |
| RSp0981   | -18.8 | 2.81E-04 | RS_RS21850 | hypothetical protein                                    |
| RSp0500   | -18.2 | 2.49E-05 | RS_RS19565 | hypothetical protein                                    |
| RSp1006   | -18.2 | 1.70E-06 | RS_RS21975 | aminotransferase                                        |
| RSp0766   | -18.0 | 2.60E-04 | RS_RS20785 | hypothetical protein                                    |
| RSp0199   | -17.8 | 3.63E-06 | RS_RS18100 | disulfide bond formation protein B                      |
| RSp1089   | -17.4 | 3.21E-04 | RS_RS22375 | pilus assembly protein CpaB                             |
| RSp0304   | -17.3 | 1.28E-06 | RS_RS18605 | hypothetical protein                                    |
| RSp1007   | -17.3 | 2.02E-05 | RS_RS21980 | acetyltransferase                                       |
| RSp1025   | -17.2 | 1.86E-06 | RS_RS22075 | membrane protein                                        |
| RSp1489   | -17.2 | 2.21E-05 | RS_RS24300 | hypothetical protein                                    |
| RSp1604   | -17.2 | 1.18E-03 | RS_RS24805 | membrane protein                                        |
| RSp1427   | -17.0 | 1.06E-05 | RS_RS24005 | hypothetical protein                                    |
| RSc0095   | -17.0 | 3.22E-03 | NA         | NA                                                      |
| RSc0118   | -17.0 | 6.13E-04 | RS_RS00580 | hypothetical protein                                    |
| RSp1488   | -16.5 | 2.87E-04 | NA         | NA                                                      |
| RSp1181   | -16.5 | 4.57E-04 | RS_RS22830 | transporter                                             |
| RSp1008   | -16.1 | 1.92E-04 | RS_RS21985 | sugar transferase                                       |
| RSp0163   | -16.1 | 1.28E-04 | RS_RS17920 | 4'-phosphopantetheinyl transferase                      |
| RSc1909   | -16.0 | 1.72E-04 | NA         | NA                                                      |
| RSp1572   | -15.9 | 5.08E-05 | RS_RS24680 | MFS transporter                                         |
| RSp0535   | -15.8 | 7.35E-04 | RS_RS19735 | LysR family transcriptional regulator                   |
| RSp0200   | -15.6 | 6.38E-05 | RS_RS18105 | aminotransferase                                        |
| RSc2108   | -15.6 | 2.98E-05 | RS_RS10575 | porin                                                   |
| RSp0568   | -15.5 | 3.38E-05 | RS_RS19860 | hypothetical protein                                    |
| RSp0956   | -15.4 | 2.29E-04 | RS_RS21725 | hypothetical protein                                    |
| RSc2286   | -15.3 | 1.75E-04 | RS_RS11470 | hypothetical protein                                    |
| RSp1491   | -15.2 | 1.95E-05 | RS_RS24310 | hypothetical protein                                    |
| RSc0613   | -15.0 | 2.23E-04 | RS_RS03075 | hypothetical protein                                    |
| RSc2751   | -15.0 | 5.28E-04 | RS_RS13765 | <i>dgoAb</i> ; D-galactonate dehydratase                |
| RSp0726   | -14.9 | 7.62E-05 | RS_RS20595 | MFS transporter                                         |
| RSc1494   | -14.7 | 7.20E-04 | RS_RS07510 | integrase                                               |
| RSp1652   | -14.7 | 6.56E-04 | RS_RS25035 | serine/threonine protein phosphatase                    |
| RSc1816   | -14.2 | 2.45E-04 | RS_RS09160 | acetyltransferase                                       |
| RSp0749   | -13.9 | 1.13E-05 | RS_RS20700 | ClpV1 family T6SS ATPase                                |
| RSc2759   | -13.8 | 6.05E-04 | RS_RS13805 | <i>dgoK</i> ; 2-dehydro-3-deoxygalactonokinase          |
| RSp0338   | -13.7 | 7.05E-05 | RS_RS18775 | <i>epsR</i> ; multidrug MFS transporter                 |
| tRNA-serW | -13.6 | 1.59E-03 | RS_RS09575 | tRNA-Ser                                                |
| RSc2757   | -13.6 | 1.01E-03 | RS_RS13795 | <i>araG</i> ; arabinose import ATP-binding protein AraG |
| RSp0519   | -13.5 | 2.64E-03 | RS_RS19655 | signal transduction ggdef domain protein                |
| RSc1729   | -13.4 | 3.91E-03 | RS_RS08735 | LysR family transcriptional regulator                   |

|         |       |          |            |                                                           |
|---------|-------|----------|------------|-----------------------------------------------------------|
| RSp0725 | -13.3 | 3.38E-05 | RS_RS20590 | radical SAM protein                                       |
| RSc2285 | -13.3 | 1.72E-05 | RS_RS11465 | signal peptidase                                          |
| RSp1439 | -13.0 | 2.95E-05 | RS_RS24065 | cysE1; serine acetyltransferase                           |
| RSp1024 | -12.7 | 4.50E-07 | RS_RS22070 | AWR family protein                                        |
| RSp0986 | -12.6 | 1.49E-03 | RS_RS21875 | <i>gbd2</i> ; 4-hydroxybutyrate dehydrogenase             |
| RSp1610 | -12.5 | 2.11E-06 | RS_RS24835 | hypothetical protein                                      |
| RSp0785 | -12.4 | 1.28E-03 | RS_RS20865 | hypothetical protein                                      |
| RSp1655 | -12.3 | 2.67E-03 | RS_RS25050 | hypothetical protein                                      |
| RSc3146 | -12.1 | 2.80E-05 | RS_RS15805 | hypothetical protein                                      |
| RSp1605 | -12.0 | 8.88E-06 | RS_RS24810 | hemagglutinin                                             |
| RSp1571 | -12.0 | 4.99E-05 | RS_RS24675 | transcriptional regulator                                 |
| RSc1819 | -11.9 | 2.87E-04 | RS_RS09175 | hypothetical protein                                      |
| RSc1926 | -11.9 | 1.69E-03 | RS_RS09705 | hypothetical protein                                      |
| RSc0233 | -11.8 | 2.50E-04 | RS_RS01145 | multidrug DMT transporter permease                        |
| RSp1137 | -11.8 | 3.17E-05 | RS_RS22605 | hypothetical protein                                      |
| RSp0738 | -11.7 | 1.29E-04 | RS_RS20645 | type VI secretion protein                                 |
| RSc3123 | -11.7 | 5.94E-08 | RS_RS15685 | transposase                                               |
| RSc1818 | -11.6 | 1.28E-05 | RS_RS09170 | <i>metG2</i> ; methionine--tRNA ligase                    |
| RSp0584 | -11.5 | 4.33E-04 | RS_RS19925 | transposase                                               |
| RSp0780 | -11.5 | 3.40E-05 | RS_RS20840 | hypothetical protein                                      |
| RSp0710 | -11.4 | 6.34E-04 | RS_RS20530 | membrane protein                                          |
| RSc0581 | -11.3 | 3.59E-05 | RS_RS02910 | phosphoglycolate phosphatase, bacterial                   |
| RSp1485 | -11.1 | 9.06E-06 | RS_RS24285 | hypothetical protein                                      |
| RSp1528 | -11.0 | 1.41E-03 | RS_RS24490 | hypothetical protein                                      |
| RSc1546 | -11.0 | 5.24E-06 | RS_RS07775 | formate acetyltransferase                                 |
| RSp0275 | -10.9 | 2.19E-05 | RS_RS18480 | membrane protein                                          |
| RSp0883 | -10.9 | 1.38E-03 | RS_RS21360 | hypothetical protein                                      |
| RSp0748 | -10.8 | 2.79E-04 | RS_RS20695 | type VI secretion protein                                 |
| RSp0641 | -10.7 | 1.68E-07 | RS_RS20185 | hybrid non-ribosomal peptide synthase/polyketide synthase |
| RSp0841 | -10.7 | 1.05E-03 | RS_RS21145 | hypothetical protein                                      |
| RSc3151 | -10.7 | 3.64E-05 | RS_RS15830 | tryptophan 2-monooxygenase oxidoreductase                 |
| RSc2106 | -10.7 | 4.04E-04 | RS_RS10565 | amino acid ABC transporter ATP-binding protein            |
| RSc0590 | -10.5 | 5.46E-05 | RS_RS02955 | MarR family transcriptional regulator                     |
| RSp0788 | -10.5 | 6.82E-05 | RS_RS20880 | carbamoyltransferase                                      |
| RSp0497 | -10.5 | 6.34E-04 | RS_RS19550 | hypothetical protein                                      |
| RSp0744 | -10.4 | 4.00E-07 | RS_RS20675 | type VI secretion protein EvpB                            |
| RSp0498 | -10.4 | 4.48E-04 | RS_RS19555 | methionine biosynthesis protein MetW                      |
| RSp1426 | -10.3 | 1.74E-03 | RS_RS24000 | hypothetical protein                                      |
| RSp0765 | -10.2 | 1.54E-03 | RS_RS20780 | hypothetical protein                                      |
| RSc2761 | -10.2 | 1.52E-03 | RS_RS13815 | LysR family transcriptional regulator                     |
| RSp1432 | -10.2 | 2.52E-04 | RS_RS24030 | hypothetical protein                                      |

|         |       |          |            |                                               |
|---------|-------|----------|------------|-----------------------------------------------|
| RSp1530 | -10.1 | 9.12E-04 | RS_RS24500 | L-ascorbate oxidase                           |
| RSp0768 | -10.1 | 3.10E-04 | RS_RS20795 | type VI secretion protein                     |
| RSp1653 | -9.8  | 3.86E-03 | RS_RS25040 | cysteine ABC transporter ATP-binding protein  |
| RSc0616 | -9.6  | 2.79E-04 | RS_RS03090 | hypothetical protein                          |
| RSp0777 | -9.6  | 1.89E-03 | NA         | NA                                            |
| RSp0787 | -9.5  | 5.56E-04 | RS_RS20875 | membrane protein                              |
| RSp0567 | -9.4  | 2.30E-03 | RS_RS19855 | transposase                                   |
| RSp0499 | -9.4  | 1.99E-04 | RS_RS19560 | MFS transporter                               |
| RSp1580 | -9.3  | 2.21E-03 | RS_RS24720 | hypothetical protein                          |
| RSc0120 | -9.3  | 4.45E-03 | RS_RS00590 | GNAT family N-acetyltransferase               |
| RSp1058 | -9.2  | 1.10E-03 | RS_RS22240 | <i>adc</i> ; acetoacetate decarboxylase       |
| RSp0736 | -9.2  | 4.68E-04 | NA         | NA                                            |
| RSp0496 | -9.1  | 3.38E-05 | RS_RS19545 | hypothetical protein                          |
| RSp1059 | -9.1  | 2.45E-04 | RS_RS22245 | 3-hydroxybutyrate dehydrogenase               |
| RSp0782 | -9.0  | 9.08E-05 | RS_RS20850 | aminoacyl-tRNA synthet                        |
| RSc2181 | -9.0  | 4.32E-04 | RS_RS10945 | radical SAM protein                           |
| RSp0638 | -9.0  | 2.52E-04 | RS_RS20175 | ABC transporter ATP-binding protein           |
| RSp1431 | -8.9  | 4.69E-04 | RS_RS24025 | oxidoreductase signal peptide protein         |
| RSp0639 | -8.8  | 2.17E-04 | RS_RS20180 | polyketide synthase                           |
| RSc0116 | -8.8  | 1.90E-03 | RS_RS00570 | hypothetical protein                          |
| RSp1483 | -8.7  | 3.87E-04 | RS_RS24275 | hypothetical protein                          |
| RSc1547 | -8.7  | 1.64E-06 | RS_RS07780 | hypothetical protein                          |
| RSc3153 | -8.6  | 3.02E-03 | RS_RS15840 | hypothetical protein                          |
| RSp0790 | -8.6  | 2.64E-03 | RS_RS20890 | hydrolase                                     |
| RSp0693 | -8.5  | 1.69E-03 | RS_RS20445 | lactoylglutathione lyase                      |
| RSp1139 | -8.5  | 1.27E-05 | RS_RS22615 | type VI secretion protein                     |
| RSp0694 | -8.3  | 3.80E-04 | RS_RS20450 | Tryptophan 2,3-dioxygenase 2                  |
| RSc3145 | -8.3  | 3.38E-05 | RS_RS15800 | transposase                                   |
| RSc0971 | -8.2  | 9.69E-06 | RS_RS04805 | hypothetical protein                          |
| RSp1168 | -8.2  | 3.29E-05 | RS_RS22765 | hypothetical protein                          |
| RSc2023 | -8.1  | 4.04E-03 | RS_RS10165 | hypothetical protein                          |
| RSp1167 | -8.1  | 3.47E-06 | RS_RS22760 | choline dehydrogenase                         |
| RSc1003 | -8.1  | 4.01E-05 | RS_RS04965 | peptidase S1                                  |
| RSp0750 | -8.1  | 1.39E-04 | RS_RS20705 | type VI secretion protein                     |
| RSp0998 | -7.9  | 2.44E-03 | RS_RS21940 | rhomboid family intramembrane serine protease |
| RSp1607 | -7.6  | 1.12E-05 | RS_RS24820 | hypothetical protein                          |
| RSp0277 | -7.5  | 1.03E-05 | RS_RS18490 | <i>treA</i> ; periplasmic trehalase           |
| RSp1490 | -7.5  | 3.90E-03 | RS_RS24305 | hypothetical protein                          |
| RSp0212 | -7.5  | 3.99E-04 | RS_RS18170 | carotenoid oxygenase                          |
| RSp0171 | -7.5  | 1.00E-03 | RS_RS17965 | hypothetical protein                          |
| RSp1606 | -7.2  | 4.04E-04 | RS_RS24815 | hypothetical protein                          |

|         |      |          |            |                                                              |
|---------|------|----------|------------|--------------------------------------------------------------|
| RSp0739 | -7.2 | 4.68E-04 | RS_RS20650 | type VI secretion system protein ImpK                        |
| RSp0882 | -7.1 | 1.09E-03 | RS_RS21355 | hypothetical protein                                         |
| RSp0740 | -7.1 | 8.83E-04 | RS_RS20655 | type VI secretion protein                                    |
| RSp0786 | -7.1 | 1.10E-03 | RS_RS20870 | beta-ketoacyl-ACP synthase                                   |
| RSp1180 | -7.1 | 2.47E-06 | RS_RS22825 | type I secretion C-terminal target domain-containing protein |
| RSp0495 | -7.1 | 1.52E-03 | RS_RS19540 | hypothetical protein                                         |
| RSc1944 | -7.0 | 6.64E-04 | RS_RS09785 | type VI secretion protein                                    |
| RSp0983 | -7.0 | 1.02E-04 | RS_RS21860 | helix-turn-helix transcriptional regulator                   |
| RSc1856 | -7.0 | 4.31E-03 | RS_RS09370 | signal peptidase                                             |
| RSp1500 | -6.8 | 2.94E-03 | RS_RS24345 | spore coat protein U                                         |
| RSp1423 | -6.8 | 4.33E-04 | RS_RS23985 | hypothetical protein                                         |
| RSp0771 | -6.8 | 7.20E-04 | RS_RS20810 | hypothetical protein                                         |
| RSc1820 | -6.6 | 1.46E-03 | RS_RS09180 | Asp/Glu/hydantoin racemase                                   |
| RSp1433 | -6.6 | 3.63E-03 | RS_RS24035 | hypothetical protein                                         |
| RSp1484 | -6.6 | 5.17E-05 | RS_RS24280 | hypothetical protein                                         |
| RSc3101 | -6.6 | 3.64E-05 | RS_RS15575 | serine protease                                              |
| RSc2388 | -6.5 | 2.87E-04 | NA         | NA                                                           |
| RSp1609 | -6.5 | 1.03E-05 | RS_RS24830 | membrane protein                                             |
| RSc1605 | -6.4 | 4.32E-08 | RS_RS08080 | hypothetical protein                                         |
| RSp1573 | -6.4 | 6.34E-04 | RS_RS24685 | hypothetical protein                                         |
| RSc0818 | -6.4 | 1.05E-03 | RS_RS04105 | endoglucanase                                                |
| RSp0278 | -6.3 | 1.74E-04 | RS_RS18495 | hypothetical protein                                         |
| RSp0737 | -6.3 | 6.88E-04 | NA         | NA                                                           |
| RSp0310 | -6.2 | 5.71E-05 | RS_RS18635 | membrane protein                                             |
| RSp0840 | -6.2 | 1.02E-03 | RS_RS21140 | membrane protein                                             |
| RSc0617 | -6.2 | 8.46E-04 | RS_RS03095 | signal peptidase                                             |
| RSp0789 | -6.1 | 3.06E-03 | RS_RS20885 | hypothetical protein                                         |
| RSc1501 | -6.1 | 3.56E-05 | RS_RS07545 | <i>mel</i> ; tyrosinase                                      |
| RSp0803 | -6.1 | 4.57E-05 | RS_RS20955 | hypothetical protein                                         |
| RSp1311 | -6.1 | 2.44E-03 | RS_RS23475 | hypothetical protein                                         |
| RSp0572 | -5.8 | 1.28E-04 | NA         | NA                                                           |
| RSc2348 | -5.7 | 6.96E-05 | RS_RS11785 | hypothetical protein                                         |
| RSc0591 | -5.7 | 5.65E-05 | RS_RS02960 | hypothetical protein                                         |
| RSc1706 | -5.7 | 2.02E-03 | RS_RS08620 | hypothetical protein                                         |
| RSp0201 | -5.6 | 3.76E-04 | RS_RS18110 | decarboxylase                                                |
| RSp0688 | -5.5 | 2.15E-03 | RS_RS20420 | membrane protein                                             |
| RSp0698 | -5.5 | 1.41E-03 | RS_RS20470 | aminotransferase                                             |
| RSp1601 | -5.4 | 8.56E-04 | RS_RS24795 | type III effector protein                                    |
| RSc2469 | -5.4 | 3.84E-03 | NA         | NA                                                           |
| RSp1608 | -5.3 | 1.68E-04 | RS_RS24825 | hypothetical protein                                         |
| RSp1239 | -5.3 | 1.81E-03 | RS_RS23120 | type III effector protein                                    |

|         |      |          |            |                                                                      |
|---------|------|----------|------------|----------------------------------------------------------------------|
| RSc0228 | -5.3 | 2.16E-03 | NA         | NA                                                                   |
| RSc1801 | -5.3 | 2.84E-03 | RS_RS09090 | GALA protein                                                         |
| RSp0724 | -5.2 | 1.76E-04 | NA         | NA                                                                   |
| RSc1502 | -5.2 | 3.30E-04 | RS_RS07550 | hypothetical protein                                                 |
| RSp0709 | -5.2 | 2.51E-05 | RS_RS20525 | cytochrome P450                                                      |
| RSp0770 | -5.1 | 3.00E-03 | RS_RS20805 | hypothetical protein                                                 |
| RSc2178 | -5.1 | 2.17E-03 | RS_RS10930 | hypothetical protein                                                 |
| RSp0735 | -5.1 | 7.63E-04 | NA         | NA                                                                   |
| RSp0175 | -5.0 | 1.29E-04 | RS_RS17985 | type VI secretion protein                                            |
| RSp0642 | -5.0 | 1.64E-06 | RS_RS20190 | non-ribosomal peptide synthetase                                     |
| RSc3251 | -4.9 | 3.94E-05 | RS_RS16280 | hypothetical protein                                                 |
| RSp0734 | -4.9 | 1.63E-03 | RS_RS20635 | hypothetical protein                                                 |
| RSp0817 | -4.9 | 2.17E-03 | RS_RS21025 | adeC/adeK/oprM family multidrug efflux complex outer membrane factor |
| RSp0629 | -4.9 | 2.64E-04 | RS_RS20130 | VGR-related protein                                                  |
| RSc1353 | -4.8 | 7.27E-04 | RS_RS06785 | <i>ilvG</i> ; thiamine pyrophosphate protein                         |
| RSc1756 | -4.7 | 2.80E-05 | RS_RS08870 | <i>pehB</i> ; exo-poly-galacturonase signal peptide protein          |
| RSp0873 | -4.7 | 3.88E-03 | RS_RS21310 | <i>hrpB</i> ; regulatory protein HrpB                                |
| RSc2182 | -4.7 | 4.92E-03 | RS_RS10950 | hypothetical protein                                                 |
| RSc1649 | -4.7 | 6.72E-04 | RS_RS08310 | membrane protein                                                     |
| RSp0559 | -4.7 | 3.73E-04 | RS_RS19820 | membrane protein                                                     |
| RSp0752 | -4.7 | 9.72E-04 | RS_RS20715 | membrane protein                                                     |
| RSp1461 | -4.6 | 2.94E-03 | RS_RS24160 | hypothetical protein                                                 |
| RSc1802 | -4.6 | 1.34E-03 | RS_RS09095 | transcriptional regulator                                            |
| RSc1895 | -4.5 | 3.53E-03 | RS_RS09570 | helix-turn-helix transcriptional regulator                           |
| RSp1022 | -4.5 | 3.79E-04 | RS_RS22055 | hypothetical protein                                                 |
| RSc0894 | -4.5 | 1.41E-03 | NA         | NA                                                                   |
| RSc1705 | -4.5 | 8.92E-05 | NA         | NA                                                                   |
| RSp0751 | -4.4 | 3.00E-03 | RS_RS20710 | hypothetical protein                                                 |
| RSc0050 | -4.3 | 7.90E-04 | RS_RS00250 | hypothetical protein                                                 |
| RSc2510 | -4.3 | 3.32E-04 | RS_RS12585 | signal peptidase                                                     |
| RSc3252 | -4.3 | 5.19E-05 | RS_RS16285 | hypothetical protein                                                 |
| RSp1285 | -4.2 | 5.46E-04 | RS_RS23350 | <i>scrA</i> ; PTS sugar transporter                                  |
| RSp1240 | -4.2 | 1.96E-04 | RS_RS23125 | murein transglycosylase                                              |
| RSc3376 | -4.2 | 1.61E-03 | RS_RS16915 | hypothetical protein                                                 |
| RSc3378 | -4.1 | 2.87E-04 | RS_RS16925 | hypothetical protein                                                 |
| RSc1707 | -4.1 | 7.62E-05 | RS_RS08625 | membrane protein                                                     |
| RSp0784 | -4.1 | 4.20E-03 | RS_RS20860 | omega-3 fatty acid desaturase                                        |
| RSc0972 | -4.0 | 5.76E-04 | RS_RS04810 | hypothetical protein                                                 |
| RSp0874 | -4.0 | 2.83E-03 | RS_RS21315 | <i>hrcC</i> ; type III secretion system outer membrane ring protein  |
| RSp0818 | -3.8 | 2.77E-04 | RS_RS21030 | multidrug efflux RND transporter permease subunit                    |
| RSp0763 | -3.8 | 1.62E-04 | RS_RS20770 | type VI secretion protein VasK                                       |

|           |      |          |            |                                                      |
|-----------|------|----------|------------|------------------------------------------------------|
| RSc2317   | -3.8 | 4.04E-03 | NA         | NA                                                   |
| RSp0294   | -3.8 | 4.72E-04 | RS_RS18570 | hemolysin-type calcium-binding protein               |
| RSp0309   | -3.8 | 5.26E-05 | RS_RS18630 | PadR family transcriptional regulator                |
| RSp0819   | -3.8 | 3.37E-03 | RS_RS21035 | hemolysin D                                          |
| RSp0534   | -3.7 | 4.12E-03 | RS_RS19730 | <i>icc</i> ; phosphohydrolase                        |
| RSc0830   | -3.7 | 2.63E-03 | RS_RS04145 | hypothetical protein                                 |
| RSc3430   | -3.6 | 4.06E-03 | RS_RS17160 | type VI secretion protein                            |
| RSp1575   | -3.6 | 3.77E-04 | RS_RS24695 | amino acid ABC transporter substrate-binding protein |
| RSc0769   | -3.6 | 7.54E-05 | RS_RS03870 | hydrolase                                            |
| RSp1274   | -3.6 | 2.58E-03 | RS_RS23290 | hypothetical protein                                 |
| RSp1183   | -3.6 | 2.59E-03 | RS_RS22840 | secretion protein HlyD                               |
| RSc0831   | -3.6 | 2.79E-04 | RS_RS04150 | hypothetical protein                                 |
| RSc1650   | -3.5 | 1.29E-04 | RS_RS08315 | hypothetical protein                                 |
| RSc1651   | -3.5 | 7.97E-05 | RS_RS08320 | hypothetical protein                                 |
| RSp0178   | -3.5 | 4.58E-04 | RS_RS18005 | hypothetical protein                                 |
| RSc0064   | -3.4 | 1.77E-04 | RS_RS00320 | AMP-dependent synthetase                             |
| RSc2902   | -3.4 | 1.44E-03 | RS_RS14540 | hypothetical protein                                 |
| RSc0948   | -3.4 | 1.86E-03 | RS_RS04715 | serine/threonine dehydratase                         |
| RSp1579   | -3.4 | 2.03E-04 | RS_RS24715 | helix-turn-helix transcriptional regulator           |
| RSc2923   | -3.4 | 1.72E-03 | RS_RS14640 | two-component sensor histidine kinase                |
| RSp0958   | -3.3 | 1.01E-03 | RS_RS21735 | iron-sulfur cluster repair di-iron protein           |
| RSp0219   | -3.3 | 9.42E-04 | RS_RS18205 | acyl-CoA dehydrogenase                               |
| RSp1282   | -3.3 | 4.02E-03 | RS_RS23335 | phosphoenolpyruvate--protein phosphotransferase      |
| RSp1581   | -3.2 | 3.21E-04 | RS_RS24725 | <i>katE</i> ; catalase                               |
| RSp1555   | -3.2 | 1.28E-04 | RS_RS24595 | <i>popF1</i> ; hypothetical protein                  |
| RSc2470   | -3.1 | 4.19E-04 | RS_RS12400 | type IV secretion protein Rhs                        |
| RSp1202   | -3.1 | 3.86E-05 | RS_RS22935 | polymerase                                           |
| RSp0792   | -3.1 | 4.00E-03 | RS_RS20900 | fatty acid desaturase                                |
| RSp1169   | -3.0 | 1.90E-03 | RS_RS22770 | metallophosphoesterase                               |
| RSp1060   | -2.9 | 9.68E-04 | RS_RS22250 | membrane protein                                     |
| RSp1574   | -2.9 | 5.36E-04 | RS_RS24690 | transcriptional regulator                            |
| RSc3437   | -2.8 | 4.59E-04 | NA         | NA                                                   |
| RSc2730   | -2.7 | 1.29E-03 | RS_RS13660 | <i>pntAa</i> ; NAD(P) transhydrogenase subunit alpha |
| RSp1203   | -2.7 | 9.18E-04 | RS_RS22940 | diguanylate cyclase                                  |
| RSc3436   | -2.7 | 1.41E-03 | NA         | NA                                                   |
| RSc1652   | -2.6 | 1.99E-03 | RS_RS08325 | <i>crtB</i> ; squalene synthase HpnD                 |
| RSc0115   | -2.6 | 1.41E-03 | RS_RS00565 | hemagglutinin                                        |
| RSp0337   | -2.5 | 2.03E-03 | RS_RS18770 | porin                                                |
| RSp0876   | -2.5 | 4.68E-04 | RS_RS21325 | <i>popB</i> ; protein PopB                           |
| RSc1874   | -2.5 | 4.75E-03 | RS_RS09465 | NUDIX hydrolase                                      |
| tRNA-glyV | -2.5 | 4.81E-03 | RS_RS05320 | tRNA-Gly                                             |

|         |      |          |            |                                               |
|---------|------|----------|------------|-----------------------------------------------|
| RSp0113 | -2.5 | 3.50E-03 | RS_RS17695 | membrane protein                              |
| RSp0112 | -2.5 | 1.98E-03 | RS_RS17690 | carbonic anhydrase                            |
| RSc0337 | -2.4 | 4.99E-04 | RS_RS01660 | polyphenol oxidase                            |
| RSp0855 | -2.4 | 1.85E-03 | RS_RS21220 | <i>hrpY</i> ; membrane protein                |
| RSc1503 | -2.4 | 3.92E-03 | RS_RS07555 | hypothetical protein                          |
| RSp0877 | -2.3 | 8.83E-04 | RS_RS21330 | <i>popA</i> ; protein PopA1                   |
| RSp0875 | -2.3 | 2.64E-03 | RS_RS21320 | <i>popC</i> ; protein PopC                    |
| RSc2824 | -2.3 | 3.41E-03 | RS_RS14125 | hypothetical protein                          |
| RSp0295 | -2.2 | 1.87E-04 | RS_RS18575 | hemolysin                                     |
| RSc2662 | -2.1 | 3.81E-03 | RS_RS13330 | mechanosensitive ion channel protein MscS     |
| RSc0724 | -2.0 | 3.34E-03 | RS_RS03645 | <i>pilY</i> ; pilus biosynthesis protein PilY |
| RSc2734 | -2.0 | 2.21E-03 | RS_RS13680 | hypothetical protein                          |
| RSc3036 | -2.0 | 1.00E-03 | RS_RS15210 | <i>rplJ</i> ; 50S ribosomal protein L10       |

<sup>a</sup> These are the original gene locus tags according to [www.ncbi.nlm.nih.gov/nuccore/AL646052.1](http://www.ncbi.nlm.nih.gov/nuccore/AL646052.1) and [www.ncbi.nlm.nih.gov/nuccore/AL646053.1](http://www.ncbi.nlm.nih.gov/nuccore/AL646053.1)

<sup>b</sup> Fold-change in gene expression in  $\Delta phcA$  compared to wild-type.

<sup>c</sup> False discovery rate (FDR), shown as adjusted *P*-value. FDR values comes from *P*-values corrected for multiple hypothesis testing with the Benjamini-Hochberg procedure.

<sup>d</sup> The new gene locus tags according to [www.ncbi.nlm.nih.gov/nuccore/NC\\_003295.1](http://www.ncbi.nlm.nih.gov/nuccore/NC_003295.1) and [www.ncbi.nlm.nih.gov/nuccore/NC\\_003296.1](http://www.ncbi.nlm.nih.gov/nuccore/NC_003296.1)

<sup>e</sup> Gene annotations based on [www.ncbi.nlm.nih.gov/nuccore/NC\\_003295.1](http://www.ncbi.nlm.nih.gov/nuccore/NC_003295.1) and [www.ncbi.nlm.nih.gov/nuccore/NC\\_003296.1](http://www.ncbi.nlm.nih.gov/nuccore/NC_003296.1)

NA indicates new locus tags and annotations are not available

**Table S1B. List of putative *R. solanacearum* transporter genes differentially expressed in  $\Delta phcA$  in planta**

| <b>Putative transporter gene(s)<sup>a</sup></b> | <b>Fold Change<sup>b</sup></b> | <b>Annotation<sup>c</sup></b>                                        |
|-------------------------------------------------|--------------------------------|----------------------------------------------------------------------|
| <b>Amino acids</b>                              |                                |                                                                      |
| RSc0481                                         | 3.1                            | amino-acid-binding periplasmic (PBP) ABC transporter protein         |
| <i>gltJ</i>                                     | 2.5                            | glutamate/aspartate transmembrane ABC transporter protein            |
| <i>gltK</i>                                     | 2.7                            | glutamate/aspartate transmembrane ABC transporter protein            |
| <i>gltL</i>                                     | 3.2                            | putative glutamate/aspartate ATP-binding ABC transporter protein     |
| RSp0481                                         | 3.4                            | substrate-binding periplasmic (PBP) ABC transporter protein          |
| RSp1575                                         | -3.6                           | amino-acid-binding periplasmic (PBP) ABC transporter protein         |
| RSc2106                                         | -10.7                          | amino-acid ATP-binding ABC transporter protein, probable <i>glnQ</i> |
| RSp0013                                         | 2.0                            | amino acid ABC transporter substrate-binding protein                 |
| RSc2257                                         | 2.6                            | amino-acid-binding periplasmic ABC transporter protein               |
| RSc3386                                         | 2.3                            | putative outer membrane signal peptide protein, <i>metQ</i>          |
| RSp0064                                         | 7.2                            | putative glycine betaine transmembrane periplasmic ABC transporter   |
| <b>Branched chain amino acids</b>               |                                |                                                                      |
| RSp1592                                         | 3.6                            | leucine-specific binding precursor transmembrane protein             |
| RSc1751                                         | 6.4                            | putative amino acid transmembrane transmembrane protein              |
| RSc1752                                         | 5.1                            | amino acid ABC transporter permease                                  |
| RSc1753                                         | 4.2                            | amino-acid ATP-binding ABC transporter protein                       |
| RSc1754                                         | 5.2                            | amino-acid ATP-binding ABC transporter protein                       |
| RSc2244                                         | 2.2                            | substrate-binding periplasmic ABC transporter protein                |
| RSc3329                                         | 2.7                            | amino-acid-binding periplasmic (PBP) ABC transporter protein         |
| RSc3341                                         | 4.8                            | transmembrane ABC transporter protein                                |
| RSc3342                                         | 4.8                            | putative substrate-binding periplasmic (PBP) ABC transporter protein |
| RSc3343                                         | 4.6                            | ABC transporter ATP-binding protein                                  |
| RSc3344                                         | 4.1                            | ABC transporter ATP-binding protein                                  |
| <b>Glutathione</b>                              |                                |                                                                      |
| <i>gsiA</i>                                     | 2.9                            | ABC transporter ATP-binding protein                                  |
| <i>gsiB</i>                                     | 3.7                            | substrate-binding periplasmic (PBP) ABC transporter protein          |
| <i>gsiC</i>                                     | 3.3                            | transmembrane ABC transporter protein                                |
| <i>gsiD</i>                                     | 3.1                            | transmembrane ABC transporter protein                                |
| <b>Glycerol and Glycerol 3-phosphate</b>        |                                |                                                                      |
| RSc3051                                         | 4.9                            | putative signal peptide protein                                      |
| RSc3047                                         | 4.3                            | ABC transporter ATP-binding protein                                  |
| RSc3048                                         | 3.1                            | sugar-phosphate transmembrane ABC transporter protein                |
| RSc3049                                         | 2.3                            | transmembrane ABC transporter protein                                |
| RSc1264                                         | 3.7                            | glycerol-3-phosphate-binding periplasmic lipoprotein signal peptide  |
| RSc1265                                         | 3.1                            | SN-glycerol-3-phosphate transmembrane ABC transporter protein        |
| RSc1266                                         | 3.3                            | SN-glycerol-3-phosphate transmembrane ABC transporter protein        |
| RSc1267                                         | 3.4                            | glycerol-3-phosphate transporter ATP-binding subunit                 |

|                       |       |                                                                          |
|-----------------------|-------|--------------------------------------------------------------------------|
| <b>Arabinose</b>      |       |                                                                          |
| RSc2758               | -23.9 | L-arabinose ABC transporter periplasmic-binding protein                  |
| RSc2756               | -9.0  | L-arabinose transporter permease protein                                 |
| RSc2757               | -13.6 | L-arabinose transporter ATP-binding protein                              |
| <b>Myo-inositol</b>   |       |                                                                          |
| RSc1241               | 4.9   | putative rhizopine-binding precursor signal peptide protein              |
| RSc1243               | 3.7   | sugar transmembrane ABC transporter protein                              |
| RSc1242               | 4.3   | sugar ATP-binding ABC transporter protein                                |
| <b>Dicarboxylates</b> |       |                                                                          |
| RSp1614               | 4.0   | transmembrane protein, probable MFS type D-galactonate transporter       |
| RSp1396               | 3.7   | transmembrane protein, probable MFS type D-galactonate transporter       |
| <i>gudP</i>           | 8.2   | putative glucarate transporter (D-glucarate permease)                    |
| RSc3059               | 3.4   | involved in the uptake of citrate and transport of protons into the cell |
| <b>Polyamines</b>     |       |                                                                          |
| RSc1734               | 8.5   | putative Fe <sup>3+</sup> /spermidine/putrescine ABC transporter         |
| RSc1732               | 5.3   | putative polyamine ABC transporter substrate-binding protein             |
| RSc1731               | 3.1   | putative polyamine ABC transporter permease                              |
| RSc1733               | 13.9  | putative spermidine/putrescine ABC transporter                           |
| <b>Nitrate</b>        |       |                                                                          |
| <i>narK1</i>          | 5.2   | nitrite/nitrate ABC transporter transmembrane protein                    |
| <i>narK2</i>          | 4.8   | nitrite/nitrate ABC transporter transmembrane protein                    |
| <b>Iron</b>           |       |                                                                          |
| RSc2937               | 22.5  | putative periplasmic iron-binding signal peptide protein                 |
| RSc2938               | 20.9  | putative transmembrane ABC transporter protein                           |
| RSc2939               | 15.6  | ABC transporter ATP-binding protein                                      |
| RSp0243               | 10.0  | heme ABC transporter                                                     |
| <b>Others</b>         |       |                                                                          |
| RSc1340               | 3.6   | aliphatic sulfonate ABC transporter transmembrane protein                |
| RSp1595               | 7.9   | 3-(3-hydroxy-phenyl) propionate transporter MhpT                         |
| RSp0638               | -9.0  | ABC transporter ATP-binding protein                                      |
| RSp1458               | 4.3   | transmembrane protein                                                    |
| RSp0726               | -14.9 | MFS (Major facilitator superfamily) transporter                          |
| RSp0499               | -9.4  | MFS transporter                                                          |
| RSp1047               | 3.0   | MFS transporter                                                          |
| RSc0547               | 5.7   | transport of small molecules; carbohydrates, organic acids, alcohols     |
| RSc1975               | 2.5   | putative transmembrane ABC transporter protein, lipooligosaccharide      |
| RSc2041               | 2.2   | putative urea/short-chain amide-binding signal peptide protein           |
| RSc1080               | 6.1   | putative hexuronate transporter transmembrane protein                    |

<sup>a</sup> Transporter function and substrate identification are based on annotation

([www.ncbi.nlm.nih.gov/nuccore/NC\\_003295.1](http://www.ncbi.nlm.nih.gov/nuccore/NC_003295.1) and [www.ncbi.nlm.nih.gov/nuccore/NC\\_003296.1](http://www.ncbi.nlm.nih.gov/nuccore/NC_003296.1)); and manual curation for binding sites or other identifying motifs. For full GenBank locus tags, see Table S1.

<sup>b</sup> These genes are differentially regulated in the  $\Delta phcA$  mutant relative to wild-type at an FDR <0.005.

<sup>c</sup> Gene annotations are from [www.ncbi.nlm.nih.gov/nuccore/NC\\_003295.1](http://www.ncbi.nlm.nih.gov/nuccore/NC_003295.1) and [www.ncbi.nlm.nih.gov/nuccore/NC\\_003296.1](http://www.ncbi.nlm.nih.gov/nuccore/NC_003296.1)

**Table S1C. List of putative *R. solanacearum* adhesion genes differentially expressed in  $\Delta phcA$  in planta**

| <b>Gene</b> <sup>a</sup> | <b>Fold change</b> <sup>b</sup> | <b>Annotation</b> <sup>c</sup>                       |
|--------------------------|---------------------------------|------------------------------------------------------|
| RSp1605                  | -12.0                           | hemagglutinin-like protein                           |
| RSp1180                  | -7.1                            | putative hemagglutinin/hemolysin-related protein     |
| RSc0115                  | -2.6                            | putative hemagglutinin-related protein               |
| RSc2796                  | 14.1                            | putative hemagglutinin-related transmembrane protein |
| RSc2797                  | 9.4                             | putative hemagglutinin-related transmembrane protein |
| RSp1620                  | 4.9                             | putative hemagglutinin-related protein               |

<sup>a</sup> The original locus tag for genes according to [www.ncbi.nlm.nih.gov/nuccore/AL646052.1](http://www.ncbi.nlm.nih.gov/nuccore/AL646052.1) and [www.ncbi.nlm.nih.gov/nuccore/AL646053.1](http://www.ncbi.nlm.nih.gov/nuccore/AL646053.1)

<sup>b</sup> These genes are differentially regulated in the  $\Delta phcA$  mutant relative to wild-type at an FDR <0.005

<sup>c</sup> Gene annotations are from [www.ncbi.nlm.nih.gov/nuccore/NC\\_003295.1](http://www.ncbi.nlm.nih.gov/nuccore/NC_003295.1) and [www.ncbi.nlm.nih.gov/nuccore/NC\\_003296.1](http://www.ncbi.nlm.nih.gov/nuccore/NC_003296.1)
