# Supplementary material for: A Single Regulator Mediates Strategic Switching between Attachment/Spread and Growth/Virulence in the Plant Pathogen Ralstonia solanacearum
Source: PubMed Central journal article supplement (PMC5615195; doi:10.1128/mbio.00895-17), 2017-09-26
Supplement: mbo005173501st2.pdf [file mbo005173501st2.pdf]

**Table S2. Growth phenotypes gained by *R. solanacearum*  $\Delta$ *phcA* on Biolog plate substrates**

| Plate Type <sup>a</sup> | Wells <sup>b</sup> | Test <sup>c</sup>                  | Area <sup>d</sup> | Nutrient(s) <sup>e</sup>  |
|-------------------------|--------------------|------------------------------------|-------------------|---------------------------|
| PM01                    | A07                | L-Aspartic Acid *                  | 40090.5           | C-Source, amino acid      |
| PM01                    | A08                | L-Proline *                        | 31937.5           | C-Source, amino acid      |
| PM01                    | B12                | L-Glutamic Acid *                  | 32384             | C-Source, amino acid      |
| PM01                    | D01                | L-Asparagine *                     | 18324.5           | C-Source, amino acid      |
| PM01                    | E01                | L-Glutamine *                      | 25325             | C-Source, amino acid      |
| PM01                    | G03                | L-Serine *                         | 34111             | C-Source, amino acid      |
| PM01                    | G04                | L-Threonine *                      | 26109             | C-Source, amino acid      |
| PM01                    | G05                | L-Alanine *                        | 31224.5           | C-Source, amino acid      |
| PM02                    | G06                | L-Histidine *                      | 45897             | C-Source, amino acid      |
| PM02                    | H03                | L-Pyroglutamic Acid                | 25456             | C-Source, amino acid      |
| PM01                    | A10                | D-Trehalose *                      | 26467             | C-Source, carbohydrate    |
| PM01                    | A12                | Dulcitol (galactitol) *            | 31256             | C-Source, carbohydrate    |
| PM01                    | C09                | a-D-Glucose *                      | 46229.5           | C-Source, carbohydrate    |
| PM01                    | F03                | m-Inositol *                       | 27059             | C-Source, carbohydrate    |
| PM01                    | A04                | D-Saccharic Acid (Glucaric acid) * | 58272             | C-Source, carboxylic acid |
| PM01                    | A05                | Succinic Acid *                    | 54940.5           | C-Source, carboxylic acid |
| PM01                    | B05                | D-Glucuronic Acid                  | 37024             | C-Source, carboxylic acid |
| PM01                    | B06                | D-Gluconic Acid *                  | 39678             | C-Source, carboxylic acid |
| PM01                    | C03                | D,L-Malic Acid *                   | 44288             | C-Source, carboxylic acid |
| PM01                    | F02                | Citric Acid *                      | 54313             | C-Source, carboxylic acid |
| PM01                    | F05                | Fumaric Acid *                     | 32817             | C-Source, carboxylic acid |
| PM01                    | F08                | Mucic Acid (galactaric acid) *     | 57037             | C-Source, carboxylic acid |
| PM01                    | G12                | L-Malic Acid *                     | 39762             | C-Source, carboxylic acid |
| PM01                    | H08                | Pyruvic Acid *                     | 27990.5           | C-Source, carboxylic acid |
| PM01                    | H09                | L-Galactonic Acid-g-Lactone        | 58369.5           | C-Source, carboxylic acid |
| PM01                    | H10                | D-Galacturonic Acid                | 57629             | C-Source, carboxylic acid |
| PM02                    | D10                | g-Amino-N-Butyric Acid *           | 29857.5           | C-Source, carboxylic acid |
| PM02                    | D12                | Butyric Acid                       | 15968.5           | C-Source, carboxylic acid |
| PM02                    | E08                | b-Hydroxybutyric Acid *            | 27990             | C-Source, carboxylic acid |
| PM02                    | F06                | Quinic Acid *                      | 46145.5           | C-Source, carboxylic acid |
| PM02                    | F12                | L-Tartaric Acid                    | 18772.5           | C-Source, carboxylic acid |
| PM01                    | G10                | Methylpyruvate *                   | 25134.5           | C-Source, ester           |
| PM03                    | B02                | Glycine *                          | 19789.5           | N-Source, amino acid      |
| PM03                    | B03                | L-Histidine *                      | 40466.5           | N-Source, amino acid      |
| PM03                    | B09                | L-Proline *                        | 22851             | N-Source, amino acid      |
| PM03                    | B10                | L-Serine *                         | 33471.5           | N-Source, amino acid      |
| PM03                    | B11                | L-Threonine *                      | 28624             | N-Source, amino acid      |
| PM03                    | B12                | L-Tryptophan                       | 9299.5            | N-Source, amino acid      |
| PM03                    | C03                | D-Alanine *                        | 21488.5           | N-Source, amino acid      |
| PM03                    | C05                | D-Aspartic Acid                    | 39935.5           | N-Source, amino acid      |
| PM03                    | C06                | D-Glutamic Acid                    | 19898.5           | N-Source, amino acid      |
| PM03                    | C10                | L-Citrulline *                     | 30283.5           | N-Source, amino acid      |
| PM03                    | D03                | L-Pyroglutamic Acid                | 25276             | N-Source, amino acid      |
| PM03                    | A02                | Ammonia                            | 49407.5           | N-Source, inorganic       |
| PM03                    | A03                | Nitrite                            | 31001             | N-Source, inorganic       |
| PM03                    | A04                | Nitrate *                          | 48364             | N-Source, inorganic       |

|      |     |                                      |         |                     |
|------|-----|--------------------------------------|---------|---------------------|
| PM03 | A05 | Urea *                               | 45439.5 | N-Source, other     |
| PM03 | F06 | Guanine                              | 43857.5 | N-Source, other     |
| PM03 | F07 | Guanosine                            | 36200.5 | N-Source, other     |
| PM03 | F12 | Inosine                              | 24070.5 | N-Source, other     |
| PM03 | G01 | Xanthine                             | 30011   | N-Source, other     |
| PM03 | G03 | Uric Acid                            | 35955.5 | N-Source, other     |
| PM03 | G08 | g-Amino-N-Butyric Acid *             | 39482   | N-Source, other     |
| PM03 | H03 | Ala-Glu                              | 28185.5 | N-Source, peptide   |
| PM04 | A02 | Phosphate                            | 56590   | P-Source, inorganic |
| PM04 | A03 | Pyrophosphate                        | 56971.5 | P-Source, inorganic |
| PM04 | A04 | Trimetaphosphate                     | 46706.5 | P-Source, inorganic |
| PM04 | A05 | Tripolyphosphate                     | 53166.5 | P-Source, inorganic |
| PM04 | B01 | Thiophosphate                        | 43514   | P-Source, inorganic |
| PM04 | B02 | Dithiophosphate                      | 46506.5 | P-Source, inorganic |
| PM04 | A08 | Adenosine 2`-Monophosphate           | 50960.5 | P-Source, organic   |
| PM04 | A09 | Adenosine 3`-Monophosphate           | 46908.5 | P-Source, organic   |
| PM04 | A10 | Adenosine 5`-Monophosphate           | 49712   | P-Source, organic   |
| PM04 | A11 | Adenosine 2`,3`-Cyclic Monophosphate | 43255   | P-Source, organic   |
| PM04 | B03 | D,L-a-Glycerol Phosphate             | 50165.5 | P-Source, organic   |
| PM04 | B04 | b-Glycerol Phosphate                 | 48360.5 | P-Source, organic   |
| PM04 | B06 | D-2-Phospho-Glyceric Acid            | 54472.5 | P-Source, organic   |
| PM04 | B07 | D-3-Phospho-Glyceric Acid            | 56664   | P-Source, organic   |
| PM04 | B08 | Guanosine 2`-Monophosphate           | 45278.5 | P-Source, organic   |
| PM04 | B09 | Guanosine 3`-Monophosphate           | 46667   | P-Source, organic   |
| PM04 | B10 | Guanosine 5`-Monophosphate           | 48251.5 | P-Source, organic   |
| PM04 | C01 | Phosphoenol Pyruvate                 | 47397.5 | P-Source, organic   |
| PM04 | C02 | Phospho-Glycolic Acid                | 45471.5 | P-Source, organic   |
| PM04 | C03 | D-Glucose-1-Phosphate *              | 48236.5 | P-Source, organic   |
| PM04 | C04 | D-Glucose-6-Phosphate                | 44694.5 | P-Source, organic   |
| PM04 | C05 | 2-Deoxy-D-Glucose 6-Phosphate        | 50699   | P-Source, organic   |
| PM04 | C06 | D-Glucosamine-6-Phosphate            | 48652   | P-Source, organic   |
| PM04 | C07 | 6-Phospho-Gluconic Acid              | 55409.5 | P-Source, organic   |
| PM04 | C08 | Cytidine 2`-Monophosphate            | 51350   | P-Source, organic   |
| PM04 | C09 | Cytidine 3`-Monophosphate            | 46718.5 | P-Source, organic   |
| PM04 | C10 | Cytidine 5`-Monophosphate            | 45070.5 | P-Source, organic   |
| PM04 | C11 | Cytidine 2`,3`-Cyclic Monophosphate  | 37698.5 | P-Source, organic   |
| PM04 | C12 | Cytidine 3`,5`-Cyclic Monophosphate  | 25363   | P-Source, organic   |
| PM04 | D01 | D-Mannose-1-Phosphate                | 40951   | P-Source, organic   |
| PM04 | D02 | D-Mannose-6-Phosphate                | 42695.5 | P-Source, organic   |
| PM04 | D03 | Cysteamine-S-Phosphate               | 46915.5 | P-Source, organic   |
| PM04 | D04 | Phospho-L-Arginine                   | 49426.5 | P-Source, organic   |
| PM04 | D05 | O-Phospho-D-Serine                   | 51723   | P-Source, organic   |
| PM04 | D06 | O-Phospho-L-Serine                   | 53257   | P-Source, organic   |
| PM04 | D07 | O-Phospho-L-Threonine                | 50154   | P-Source, organic   |

|      |     |                                    |         |                     |
|------|-----|------------------------------------|---------|---------------------|
| PM04 | D08 | Uridine 2`-Monophosphate           | 49059   | P-Source, organic   |
| PM04 | D09 | Uridine 3`-Monophosphate           | 50122   | P-Source, organic   |
| PM04 | D10 | Uridine 5`-Monophosphate           | 47772.5 | P-Source, organic   |
| PM04 | D11 | Uridine 2`,3`-Cyclic Monophosphate | 43864   | P-Source, organic   |
| PM04 | E01 | O-Phospho-D-Tyrosine               | 42393   | P-Source, organic   |
| PM04 | E02 | O-Phospho-L-Tyrosine               | 39619.5 | P-Source, organic   |
| PM04 | E03 | Phosphocreatine                    | 50696.5 | P-Source, organic   |
| PM04 | E04 | Phosphoryl Choline                 | 44046.5 | P-Source, organic   |
| PM04 | E05 | O-Phosphoryl-Ethanolamine          | 48115   | P-Source, organic   |
| PM04 | E09 | Thymidine 3`-Monophosphate         | 48093.5 | P-Source, organic   |
| PM04 | E10 | Thymidine 5`-Monophosphate         | 49231.5 | P-Source, organic   |
| PM04 | E11 | Inositol Hexaphosphate             | 40832.5 | P-Source, organic   |
| PM04 | F02 | Sulfate                            | 49470.5 | S-Source, inorganic |
| PM04 | F03 | Thiosulfate                        | 47178   | S-Source, inorganic |
| PM04 | F04 | Tetrathionate                      | 46468   | S-Source, inorganic |
| PM04 | F05 | Thiophosphate                      | 45956   | S-Source, inorganic |
| PM04 | F06 | Dithiophosphate                    | 54899.5 | S-Source, organic   |
| PM04 | F07 | L-Cysteine                         | 54087.5 | S-Source, organic   |
| PM04 | F08 | D-Cysteine                         | 50186   | S-Source, organic   |
| PM04 | F09 | Cys-Gly                            | 50247.5 | S-Source, organic   |
| PM04 | F10 | L-Cysteic Acid                     | 49497   | S-Source, organic   |
| PM04 | F11 | Cysteamine                         | 37190.5 | S-Source, organic   |
| PM04 | F12 | L-Cysteine Sulfinic Acid           | 47504   | S-Source, organic   |
| PM04 | G02 | S-Methyl-L-Cysteine                | 36078   | S-Source, organic   |
| PM04 | G03 | Cystathionine                      | 43588   | S-Source, organic   |
| PM04 | G04 | Lanthionine                        | 42943   | S-Source, organic   |
| PM04 | G05 | Glutathione                        | 37641.5 | S-Source, organic   |
| PM04 | G07 | L-Methionine *                     | 53752   | S-Source, organic   |
| PM04 | G08 | D-Methionine                       | 50138.5 | S-Source, organic   |
| PM04 | G09 | Gly-Met                            | 53437   | S-Source, organic   |
| PM04 | G10 | N-Acetyl-D,L-Methionine            | 48371   | S-Source, organic   |
| PM04 | G11 | L-Methionine Sulfoxide             | 48806   | S-Source, organic   |
| PM04 | G12 | L-Methionine Sulfone               | 39562.5 | S-Source, organic   |
| PM04 | H01 | L-Djenkolic Acid                   | 39412   | S-Source, organic   |
| PM04 | H02 | Thiourea                           | 33875   | S-Source, organic   |
| PM04 | H05 | Taurocholic Acid                   | 36527.5 | S-Source, organic   |
| PM04 | H06 | Taurine *                          | 48386.5 | S-Source, organic   |
| PM04 | H07 | Hypotaurine                        | 50062.5 | S-Source, organic   |
| PM04 | H09 | Butane Sulfonic Acid               | 51184.5 | S-Source, organic   |
| PM04 | H10 | 2-Hydroxyethane Sulfonic Acid      | 48638   | S-Source, organic   |
| PM04 | H11 | Methane Sulfonic Acid              | 49897.5 | S-Source, organic   |

<sup>a</sup> Biolog plate type.

<sup>b</sup> Well location for this substrate in the corresponding Biolog plate type.

<sup>c</sup> Substrates for which  $\Delta phcA$  gained a growth phenotype when compared to wild-type.

<sup>d</sup> Area was measured as the sum of reads during bacterial growth over 72 h ( $P < 0.01$ ).

<sup>e</sup> Substrate or nutrient tested.

\* Asterisk indicates nutrients found in tomato xylem sap.
