# Supplementary material for: A Single Regulator Mediates Strategic Switching between Attachment/Spread and Growth/Virulence in the Plant Pathogen Ralstonia solanacearum
Source: PubMed Central journal article supplement (PMC5615195; doi:10.1128/mbio.00895-17), 2017-09-26
Supplement: mbo005173501st3.pdf [file mbo005173501st3.pdf]

**Table S3. Biochemistry of the xylem habitat occupied by *R. solanacearum***

| Compounds present in tomato xylem sap <sup>a</sup> | Growth (C or N source) <sup>b</sup> | Pathway Function <sup>c</sup> | Kegg Pathway <sup>d</sup> | Gene <sup>e</sup>        | FC <sup>f</sup> | Annotation <sup>g</sup>                                             |
|----------------------------------------------------|-------------------------------------|-------------------------------|---------------------------|--------------------------|-----------------|---------------------------------------------------------------------|
| <b>Sugar</b>                                       |                                     |                               |                           |                          |                 |                                                                     |
| Unknown disaccharide                               | NT                                  |                               |                           | RSc1081                  | 7.1             | glucosidase                                                         |
| sucrose <sup>1,2,•</sup>                           | Both                                | Sucrose utilization           | rso00500                  | RSp1285 ( <i>scrA</i> )  | -4.2            | PTS system, sucrose-specific (IIBC component) transmembrane protein |
| trehalose <sup>•</sup>                             | Wild-type                           | Trehalose utilization         | rso00500                  | RSp0277 ( <i>treA</i> )  | -7.5            | periplasmic alpha,alpha-trehalase                                   |
| glucose-1-phosphate <sup>•</sup>                   | $\Delta phcA$ *                     |                               |                           |                          |                 |                                                                     |
| cellobiose <sup>•</sup>                            | Neither                             |                               |                           |                          |                 |                                                                     |
| beta-gentiobiose <sup>•</sup>                      | Neither                             |                               |                           |                          |                 |                                                                     |
| maltose <sup>•</sup>                               | Neither                             |                               |                           |                          |                 |                                                                     |
| N-acetyl-D-hexosamine <sup>•</sup>                 | Neither                             |                               |                           |                          |                 |                                                                     |
| digitoxose <sup>•</sup>                            | NT                                  |                               |                           |                          |                 |                                                                     |
| ribose <sup>•</sup>                                | Neither                             |                               |                           |                          |                 |                                                                     |
| xylulose <sup>•</sup>                              | NT                                  |                               |                           |                          |                 |                                                                     |
| m-inositol <sup>•</sup>                            | $\Delta phcA$ *                     | Inositol utilization          | rso00562                  | RSc1238 ( <i>iolE</i> )  | 3.1             | putative myo-inositol catabolism protein                            |
|                                                    |                                     |                               |                           | RSc1239 ( <i>iolD</i> )  | 5.0             | putative acetolactate synthase protein                              |
|                                                    |                                     |                               |                           | RSc1240 ( <i>iolC</i> )  | 3.6             | transferase kinase protein                                          |
|                                                    |                                     |                               |                           | RSc1244 ( <i>iolH</i> )  | 4.5             | putative protein in m-inositol catabolic pathway                    |
|                                                    |                                     |                               |                           | RSc1245 ( <i>iolI</i> )  | 5.0             | putative protein in m-inositol catabolic pathway                    |
|                                                    |                                     |                               |                           | RSc1246 ( <i>iolG</i> )  | 4.2             | putative oxidoreductase m-inositol 2-dehydrogenase                  |
|                                                    |                                     |                               |                           | RSc1247                  | 4.1             | putative myo-inositol catabolism protein                            |
| erythrose <sup>•</sup>                             | NT                                  |                               |                           |                          |                 |                                                                     |
| galactinol <sup>•</sup>                            | NT                                  |                               |                           |                          |                 |                                                                     |
| glycerol-3-galactoside <sup>•</sup>                | NT                                  |                               |                           |                          |                 |                                                                     |
| hexitol (mannitol) <sup>•</sup>                    | Both                                |                               |                           |                          |                 |                                                                     |
| fucose <sup>•</sup>                                | Neither                             |                               |                           |                          |                 |                                                                     |
| N-acetylmannosamine <sup>•</sup>                   | Neither                             |                               |                           |                          |                 |                                                                     |
| 1-methylgalactose <sup>•</sup>                     | NT                                  |                               |                           |                          |                 |                                                                     |
| 6-deoxyglucose <sup>•</sup>                        | NT                                  |                               |                           |                          |                 |                                                                     |
| xylose <sup>•</sup>                                | Neither                             |                               |                           |                          |                 |                                                                     |
| levoglucosan <sup>•</sup>                          | NT                                  |                               |                           |                          |                 |                                                                     |
| 3,6-anhydro-D-galactose <sup>•</sup>               | NT                                  |                               |                           |                          |                 |                                                                     |
| fructose <sup>2,•</sup>                            | Both                                |                               |                           |                          |                 |                                                                     |
| glucose <sup>2,•</sup>                             | $\Delta phcA$ *                     |                               |                           | RSc1231 ( <i>tal</i> )   | 2.1             | transaldolase                                                       |
| galactose <sup>2,•</sup>                           | Wild-type                           | Galactose utilization         | rso00052                  | RSc2751 ( <i>dgoAb</i> ) | -15.0           | putative galactonate dehydratase protein                            |
|                                                    |                                     |                               |                           | RSc2759                  | -13.8           | 2-dehydro-3-deoxygalactonokinase protein                            |

(*dgoK*)

|                                   |                 |                                                      |          |                             |       |                                                                          |
|-----------------------------------|-----------------|------------------------------------------------------|----------|-----------------------------|-------|--------------------------------------------------------------------------|
| mannose <sup>2, •</sup>           | Neither         |                                                      |          |                             |       |                                                                          |
| <b>Amino acids</b>                |                 |                                                      |          |                             |       |                                                                          |
| arginine <sup>2,3,4</sup>         | Both            |                                                      |          |                             |       |                                                                          |
| tyrosine <sup>2,3,4, •</sup>      | Both            |                                                      |          |                             |       |                                                                          |
| phenylalanine <sup>2,3,4, •</sup> | Both            | Phenyl-<br>alanine<br>synthesis                      | rso00400 | RSc2512                     | 2.2   | arogenate dehydratase                                                    |
| isoleucine <sup>2,3,4, •</sup>    | Both            | Valine,<br>isoleucine,<br>and leucine<br>degradation | rso00280 | RSc1762                     | 3.8   | acyl-CoA dehydrogenase                                                   |
| valine <sup>2,3,4, •</sup>        | $\Delta phcA$   |                                                      |          | RSc2020                     | 4.6   | acyl-CoA dehydrogenase                                                   |
| leucine <sup>2,3,4, •</sup>       | $\Delta phcA$   |                                                      |          | RSc0475                     | 2.6   | acetyl-CoA acetyltransferase                                             |
|                                   |                 |                                                      |          | RSp1591                     | 3.0   | aldehyde dehydrogenase                                                   |
| beta-alanine <sup>•</sup>         | Both            | Beta-alanine<br>utilization                          | rso00410 | RSc0029<br>( <i>goaG</i> )  | 7.0   | 4-aminobutyrate transaminase                                             |
| asparagine <sup>2,4, •</sup>      | $\Delta phcA$ * |                                                      |          |                             |       |                                                                          |
| glutamine <sup>2,4, •</sup>       | $\Delta phcA$ * |                                                      |          |                             |       |                                                                          |
| aspartic acid <sup>2,3,4</sup>    | $\Delta phcA$ * | Aspartate<br>degradation                             |          | RSp1263                     | -32   | L-aspartate oxidase                                                      |
| histidine <sup>2,3,4</sup>        | $\Delta phcA$ * | Histidine<br>degradation                             | rso00340 | RSc2647                     | 2.7   | urocanate hydratase                                                      |
| threonine <sup>3,4, •</sup>       | $\Delta phcA$ * | Isoleucine<br>synthesis<br>from<br>threonine         | rso00290 | RSc0948                     | -3.4  | serine/threonine dehydratase                                             |
| alanine <sup>2,3,4, •</sup>       | $\Delta phcA$ * |                                                      |          |                             |       |                                                                          |
| proline <sup>2,3,4, •</sup>       | $\Delta phcA$   | Proline and<br>Ornithine<br>degradation              | rso00330 | RSc0159                     | 3.9   | ornithine--oxo-acid transaminase                                         |
| ornithine <sup>2,3, •</sup>       | Neither         |                                                      |          | RSp0418                     | 3.8   | 2,3-diaminopropionate biosynthesis protein SbnB                          |
|                                   |                 |                                                      |          | RSp0483                     | 2.6   | ornithine cyclodeaminase                                                 |
| glutamic acid <sup>2,3,4, •</sup> | $\Delta phcA$ * |                                                      |          |                             |       |                                                                          |
| methionine <sup>3,4,5</sup>       | $\Delta phcA$   | Methionine<br>synthesis                              | rso00270 | RSc1562                     | 2.8   | O-acetylhomoserine<br>aminocarboxypropyltransferase                      |
|                                   |                 |                                                      |          | RSp0676<br>( <i>metE</i> )  | 2.2   | 5-methyltetrahydropteroyltriglutamate-<br>homocysteine methyltransferase |
|                                   |                 |                                                      |          | RSp0781                     | -22.4 | cystathionine gamma-synthase                                             |
| glycine <sup>3, •</sup>           | $\Delta phcA$   | Glycine/Seri<br>ne utilization                       | rso00260 | RSp0055                     | 9.3   | serine hydroxymethyltransferase                                          |
| citrulline <sup>3, •</sup>        | $\Delta phcA$   |                                                      |          |                             |       |                                                                          |
| serine <sup>2,3, •</sup>          | $\Delta phcA$ * | Cysteine<br>synthesis<br>from serine                 | rso00270 |                             |       |                                                                          |
| O-acetylserine <sup>•</sup>       | $\Delta phcA$ * |                                                      |          | RSp1439<br>( <i>cysEI</i> ) | -13.0 | serine acetyltransferase                                                 |
| Taurine <sup>2</sup>              | $\Delta phcA$   | Sulfur<br>metabolism                                 | rso00920 | RSc0746<br>( <i>tauD</i> )  | 2.8   | taurine dioxygenase                                                      |
| lysine <sup>2,3,4, •</sup>        | Neither         | Lysine<br>synthesis                                  | rso00300 | RSp0424                     | 3.6   | diaminopimelate decarboxylase                                            |
| homoserine <sup>•</sup>           | Neither         |                                                      |          |                             |       |                                                                          |

|                                      |                 |                                                          |          |                             |      |                                                         |
|--------------------------------------|-----------------|----------------------------------------------------------|----------|-----------------------------|------|---------------------------------------------------------|
| N-methylalanine •                    | NT              |                                                          |          |                             |      |                                                         |
| oxoproline •                         | NT              |                                                          |          |                             |      |                                                         |
| hydroxylysine <sup>2</sup>           | NT              |                                                          |          |                             |      |                                                         |
| <b>Carboxylic acids</b>              |                 |                                                          |          |                             |      |                                                         |
| citric acid <sup>4,•</sup>           | $\Delta phcA$ * |                                                          |          |                             |      |                                                         |
| 4-aminobutyric acid <sup>2,4,•</sup> | $\Delta phcA$ * | GABA utilization                                         | rso00250 | RSc0028<br>( <i>gabD1</i> ) | 3.7  | NAD-dependent succinate-semialdehyde dehydrogenase      |
|                                      |                 |                                                          |          | RSc0029<br>( <i>goaG</i> )  | 7.0  | 4-aminobutyrate transaminase                            |
| fumaric acid <sup>4,5,•</sup>        | $\Delta phcA$ * |                                                          |          |                             |      |                                                         |
| succinic acid <sup>4,5,•</sup>       | $\Delta phcA$   |                                                          |          |                             |      |                                                         |
| malic acid <sup>4,5,•</sup>          | $\Delta phcA$ * | TCA and glyoxylate cycles                                | rso00020 | RSp0814<br>( <i>mgo</i> )   | 4.4  | malate:quinone oxidoreductase                           |
| gluconic acid •                      | $\Delta phcA$   |                                                          |          | RSc1763                     | 3.2  | gluconate 2-dehydrogenase                               |
| pyruvic acid •                       | $\Delta phcA$ * | Valine synthesis from pyruvate                           | rso00290 | RSc1353<br>( <i>ilvG</i> )  | -4.8 | acetolactate synthase 2 catalytic subunit               |
|                                      |                 | Pyruvate metabolism                                      | rso00620 | RSc1798                     | 4.8  | 2-oxoisovalerate dehydrogenase subunit beta             |
|                                      |                 |                                                          |          | RSc1799                     | 7.4  | branched-chain alpha-keto acid dehydrogenase subunit E2 |
| galactaric acid •                    | $\Delta phcA$ * | Pectin/Galacturonate/Galactarate/glucuronate utilization | rso00053 | RSp0826                     | 7.6  | 5-dehydro-4-deoxyglucuronate dehydratase                |
| glucaric acid •                      | $\Delta phcA$ * |                                                          |          | RSp0827                     | 5.3  | 2,5-dioxovalerate dehydrogenase                         |
|                                      |                 |                                                          |          | RSp0829<br>( <i>gudD2</i> ) | 7.9  | glucarate dehydratase                                   |
|                                      |                 |                                                          |          | RSp0830<br>( <i>garD</i> )  | 5.9  | galactarate dehydratase                                 |
|                                      |                 |                                                          |          | RSp0831                     | 6.3  | NAD-dependent dehydratase                               |
|                                      |                 |                                                          |          | RSp0832                     | 4.9  | gluconolactonase                                        |
|                                      |                 |                                                          |          | RSp0880*                    | 2.2  | polygalacturonase                                       |
|                                      |                 |                                                          |          | RSc1756<br>( <i>pehB</i> )  | -4.7 | exo-poly-galacturonase                                  |
| glycolic acid •                      | $\Delta phcA$ * |                                                          |          |                             |      |                                                         |
| quinic acid •                        | $\Delta phcA$ * |                                                          |          |                             |      |                                                         |
| 3-hydroxybutyric acid •              | $\Delta phcA$ * |                                                          |          |                             |      |                                                         |
| glucuronic acid •                    | $\Delta phcA$ * |                                                          |          |                             |      |                                                         |
| ascorbic acid <sup>5</sup>           | Neither         |                                                          |          |                             |      |                                                         |
| 2,4-diaminobutyric acid •            | Neither         |                                                          |          |                             |      |                                                         |
| lactic acid •                        | Neither         |                                                          |          |                             |      |                                                         |
| benzoic acid •                       | Neither         |                                                          |          |                             |      |                                                         |
| shikimic acid •                      | Neither         |                                                          |          |                             |      |                                                         |
| malonic acid <sup>5</sup>            | NT              |                                                          |          |                             |      |                                                         |
| maleic acid <sup>5</sup>             | NT              |                                                          |          |                             |      |                                                         |

|                           |    |
|---------------------------|----|
| threonic acid •           | NT |
| 3-aminoisobutyric acid •  | NT |
| pipecolic acid •          | NT |
| galactonic acid •         | NT |
| nonoic acid •             | NT |
| 3-hydroxypropionic acid • | NT |
| ribonic acid •            | NT |
| 2-hydroxyvaleric acid •   | NT |
| hexonic acid •            | NT |
| adipic acid •             | NT |
| hydroxycarbamate •        | NT |

### Amines

|                             |         |  |         |     |                                          |
|-----------------------------|---------|--|---------|-----|------------------------------------------|
| putrescine •                | Neither |  |         |     |                                          |
| ethanolamine <sup>3</sup> • | Neither |  | RSc3127 | 6.9 | ethanolamine ammonia lyase large subunit |
| phenylethylamine •          | Neither |  |         |     |                                          |
| tyramine •                  | Neither |  |         |     |                                          |
| spermidine •                | Neither |  |         |     |                                          |
| phenylethylamine •          | NT      |  |         |     |                                          |
| noradrenaline •             | NT      |  |         |     |                                          |
| cyclohexylamine •           | NT      |  |         |     |                                          |

### Other nitrogenous compounds

|                        |                 |                      |          |                                                                                                                                               |                                                                                                                                                                                                                                                                                                  |
|------------------------|-----------------|----------------------|----------|-----------------------------------------------------------------------------------------------------------------------------------------------|--------------------------------------------------------------------------------------------------------------------------------------------------------------------------------------------------------------------------------------------------------------------------------------------------|
| ammonia <sup>4</sup>   | $\Delta phcA$ * |                      |          |                                                                                                                                               |                                                                                                                                                                                                                                                                                                  |
| nitrate <sup>4,6</sup> | $\Delta phcA$ * | Denitri-<br>fication | rsp00910 | RSp0974<br>(narG)<br>3.63<br>RSp0975<br>(narH)<br>3.28<br>RSp0976<br>(narJ)<br>4.12<br>RSp0977<br>(narI)<br>3.25<br>RSp1503<br>(aniA)<br>-3.5 | respiratory nitrate reductase<br>alpha chain oxidoreductase<br>respiratory nitrate reductase oxidoreductase<br>respiratory nitrate reductase oxidoreductase<br>respiratory nitrate reductase oxidoreductase<br>respiratory nitrate reductase transmembrane<br>nitrate reductase membrane protein |
| urea <sup>2</sup> •    | $\Delta phcA$ * |                      |          |                                                                                                                                               |                                                                                                                                                                                                                                                                                                  |
| hydroxylamine •        | Neither         |                      |          |                                                                                                                                               |                                                                                                                                                                                                                                                                                                  |
| thymine •              | Neither         |                      |          |                                                                                                                                               |                                                                                                                                                                                                                                                                                                  |
| uracil •               | Neither         |                      |          |                                                                                                                                               |                                                                                                                                                                                                                                                                                                  |
| adenosine •            | Neither         |                      |          |                                                                                                                                               |                                                                                                                                                                                                                                                                                                  |

### Fatty acids

|                      |    |                           |          |         |      |                              |
|----------------------|----|---------------------------|----------|---------|------|------------------------------|
| decanoic acid •      | NT | Fatty Acid<br>degradation | rso00071 | RSc0064 | -3.4 | AMP-dependent synthetase     |
| pentadecanoic acid • | NT |                           |          | RSc1761 | 3.3  | acetyl-CoA acetyltransferase |
| palmitic acid •      | NT |                           |          | RSc1762 | 3.8  | acyl-CoA dehydrogenase       |
| arachidic acid •     | NT |                           |          | RSc2020 | 4.6  | acyl-CoA dehydrogenase       |

|                |    |         |     |                                 |
|----------------|----|---------|-----|---------------------------------|
| lauric acid •  | NT | RSc0474 | 2.7 | 3-hydroxyacyl-CoA dehydrogenase |
| stearic acid • | NT | RSc0475 | 2.6 | acetyl-CoA acetyltransferase    |

### Alcohols

|                         |               |
|-------------------------|---------------|
| galactitol (dulcitol) • | $\Delta phcA$ |
| dihydroxyacetone •      | Neither       |
| lyxitol •               | Neither       |
| xylitol •               | Neither       |
| ribitol •               | Neither       |
| diacetone alcohol •     | NT            |
| octadecanol •           | NT            |
| pentitol •              | NT            |
| 1-hexadecanol •         | NT            |
| threitol •              | NT            |
| benzylalcohol •         | NT            |
| octanol •               | NT            |
| 1-deoxyerythritol •     | NT            |
| deoxypentitol •         | NT            |

### Others

|                                      |         |
|--------------------------------------|---------|
| butyrolactam •                       | NT      |
| conduritol-beta-expoixide •          | NT      |
| piperidone •                         | NT      |
| acetophenone •                       | NT      |
| salicylaldehyde •                    | Neither |
| glyceric acid •                      | NT      |
| 1,2-dihydroxycyclohexane •           | NT      |
| propane-1,3-diol •                   | NT      |
| dodecanoic acid, isopropanol ester • | NT      |
| Phosphoserine •                      | NT      |

### Compounds not known to be present in xylem sap <sup>h</sup>

|                       |    |                                  |                  |                   |
|-----------------------|----|----------------------------------|------------------|-------------------|
| Hydroxycinnamic acids | NT | Hydroxycinnamic acid degradation | Lowe et al, 2015 | RSp0227<br>(fcs)  |
|                       |    |                                  |                  | RSp0225<br>(fca)  |
|                       |    |                                  |                  | RSp0226<br>(vdh)  |
|                       |    |                                  |                  | RSc1442<br>(pcaG) |
|                       |    |                                  |                  | RSc2253<br>(pcaJ) |
|                       |    |                                  |                  | RSc2254<br>(pcaI) |

|             |               |                                         |          |                                                                                                                        |
|-------------|---------------|-----------------------------------------|----------|------------------------------------------------------------------------------------------------------------------------|
| Glutathione | $\Delta phcA$ | Glutathione metabolism                  | rso00480 | RSc2012<br>( <i>gstH</i> )<br>RSp0274<br>( <i>ggtI</i> )<br>RSp0532                                                    |
| Cysteine    | $\Delta phcA$ | Sulfur Assimilation /Cysteine Synthesis | rso00920 | RSc2421<br>( <i>cysN</i> )<br>RSc2422<br>( <i>cysD</i> )<br>RSc2425<br>( <i>cysII</i> )<br>RSp0417<br>( <i>cysK2</i> ) |

<sup>a</sup> Metabolites found in xylem sap are either previously known (indicated by reference number) or identified in this study (indicated by solid black circle).

<sup>b</sup> Growth of wild-type or  $\Delta phcA$  bacteria in the respective metabolite, determined either by growth on the relevant Biolog plate or in Boucher's minimal medium (BMM) supplemented with 10mM metabolite as described in Materials and Methods. Asterisk indicates that  $\Delta phcA$  grew better than wild-type in this metabolites.

<sup>c</sup> Pathway assignment based on KEGG.

<sup>d</sup> Pathway annotation number based on KEGG.

<sup>e</sup> Differentially expressed genes that correspond to the respective metabolite. These genes are identified by the original locus tag based on [www.ncbi.nlm.nih.gov/nucore/AL646052.1](http://www.ncbi.nlm.nih.gov/nucore/AL646052.1) and [www.ncbi.nlm.nih.gov/nucore/AL646053.1](http://www.ncbi.nlm.nih.gov/nucore/AL646053.1). Genes with green locus tags are induced at high cell density and genes with purple locus tags are induced at low cell density

<sup>f</sup> FC indicates gene expression fold change values in  $\Delta phcA$  relative to wild-type.

<sup>g</sup> Gene annotations based on [www.ncbi.nlm.nih.gov/nucore/NC\\_003295.1](http://www.ncbi.nlm.nih.gov/nucore/NC_003295.1) and [www.ncbi.nlm.nih.gov/nucore/NC\\_003296.1](http://www.ncbi.nlm.nih.gov/nucore/NC_003296.1).

<sup>h</sup> These compounds were not detected in xylem sap, but the corresponding genes are differentially expressed in  $\Delta phcA$  and they have been tested as growth substrates for WT and  $\Delta phcA$  Rs.

## References

1. **Jacobs JM, Babujee L, Meng F, Milling A, Allen C.** 2012. The in planta transcriptome of *Ralstonia solanacearum*: conserved physiological and virulence strategies during bacterial wilt of tomato. *MBio* **3**.
2. **Zuluaga AP, Puigvert M, Valls M.** 2013. Novel plant inputs influencing *Ralstonia solanacearum* during infection. *Front Microbiol* **4**:349.
3. **Dixon GR, Pegg GF.** 1972. Changes in amino-acid content of tomato xylem sap following infection with strains of *Verticillium albo-atrum*. *Ann Bot* **36**:147-154.
4. **Bialczyk J, Lechowski Z, Dziga D.** 2004. Composition of the xylem sap of tomato seedlings cultivated on media with HCO<sub>3</sub><sup>-</sup> and nitrogen source as NO<sub>3</sub><sup>-</sup> or NH<sub>4</sub><sup>+</sup>. *Plant and Soil* **263**:1265-1272.
5. **Senden MHMN, Van Der Meer AJGM, Limborgh J, Wolterbeek HT.** 1992. Analysis of major tomato xylem organic acids and PITC-derivatives of amino acids by RP-HPLC and UV detection. *Plant and Soil* **142**:81-89.
6. **Dalsing BL, Truchon AN, Gonzalez-Orta ET, Milling AS, Allen C.** 2015. Inorganic nitrogen reduction and detoxification are necessary for full *Ralstonia solanacearum* virulence on tomato. *mBio* **6**:e02471-02414.
