# Supplementary material for: A Single Regulator Mediates Strategic Switching between Attachment/Spread and Growth/Virulence in the Plant Pathogen Ralstonia solanacearum
Source: PubMed Central journal article supplement (PMC5615195; doi:10.1128/mbio.00895-17), 2017-09-26
Supplement: mbo005173501st5.pdf [file mbo005173501st5.pdf]

**Table S5: List of *R. solanacearum* traits expressed differently *in vitro* and *in planta***

| <b>Previously Known Phenotypes</b> | <b>Expression in culture or <i>in planta</i></b>                                                                         | <b>Based on <i>in planta</i> RNA seq data</b>                                                          |
|------------------------------------|--------------------------------------------------------------------------------------------------------------------------|--------------------------------------------------------------------------------------------------------|
| Swimming motility                  | not regulated by PhcA <sup>1,2</sup> , repressed by PhcA <sup>3</sup>                                                    | No change in expression levels of motility genes                                                       |
| EPS                                | Positively regulated by PhcA <i>in culture</i> <sup>4</sup> , Positively regulated by PhcA <i>in planta</i> <sup>5</sup> | Positively regulated by PhcA                                                                           |
| T3SS                               | Repressed by PhcA in culture <sup>6</sup> , not repressed by PhcA <i>in planta</i> <sup>7,8</sup>                        | <i>hrcC</i> , <i>hrpB</i> , <i>popA</i> , <i>popB</i> and <i>popC</i> are positively regulated by PhcA |
| Iron/siderohore                    | Repressed by PhcA <sup>9</sup>                                                                                           | same                                                                                                   |
| SolIR QS system                    | Positively regulated by PhcA <sup>10</sup>                                                                               | same                                                                                                   |
| Cellulase, endo glucanase          | Positively regulated <sup>4,11</sup>                                                                                     | same                                                                                                   |
| Ralfuranone synthesis              | Positively regulated by PhcA <sup>12</sup>                                                                               | same                                                                                                   |
| TEK production                     | Induced by PhcA <sup>4</sup>                                                                                             | same                                                                                                   |
| Twitching motility                 | <i>pilA</i> expression is repressed PhcA via PehR <sup>13</sup>                                                          | not affected                                                                                           |
| <b>New Phenotypes</b>              | <b>Phenotypes known in culture or <i>in planta</i></b>                                                                   | <b>Based on <i>in planta</i> RNA seq data</b>                                                          |
| T6SS                               | not known                                                                                                                | Positively regulated by PhcA                                                                           |
| Nitrogen metabolism                | denitrification genes are activated in planta <sup>7</sup>                                                               | Repressed by PhcA                                                                                      |
| Rhs                                | not known                                                                                                                | 3 of the rhs genes expression were down regulated                                                      |
| Hemagglutinin                      | not known                                                                                                                | differentially regulated                                                                               |
| Chemotaxis                         | not known                                                                                                                | <i>cheY</i> and <i>cheD2</i> downregulated in <i>phcA</i> mutant                                       |
| Autolysin                          | not known                                                                                                                | not affected                                                                                           |
| Biofilm formation                  | reduced in <i>phcA</i> mutant                                                                                            | <i>phcA</i> mutant forms "Mat" like structure near the point of infection                              |
| Sulfur metabolism                  | Not known                                                                                                                | Repressed by PhcA                                                                                      |
| Carbon metabolism                  | Not known                                                                                                                | Pyruvate metabolism and TCA cycle upregulated                                                          |

## References

1. **Brumbley SM, Denny TP.** 1990. Cloning of wild-type *Pseudomonas solanacearum* *phcA*, a gene that when mutated alters expression of multiple traits that contribute to virulence. *J Bacteriol.*; **172**:5677-85.
2. **Tans-Kersten J, Brown D, Allen C.** 2004. Swimming motility, a virulence trait of *Ralstonia solanacearum*, is regulated by FlhDC and the plant host environment. *Mol Plant Microbe Interact.* **17**:686-95.
3. **Clough SJ, Flavier AB, Schell MA, Denny TP.** 1997. Differential Expression of Virulence Genes and motility in *Ralstonia* (*Pseudomonas*) *solanacearum* during exponential growth. *Appl Environ Microbiol.* **63**:844-50.
4. **Brumbley SM, Carney BF, Denny TP.** 1993. Phenotype conversion in *Pseudomonas solanacearum* due to spontaneous inactivation of PhcA, a putative LysR transcriptional regulator. *J Bacteriol.* **175**:5477-87. .
5. **McGarvey JA, Denny TP, Schell MA.** 1999. Spatial-Temporal and quantitative analysis of Growth and EPS I Production by *Ralstonia solanacearum* in resistant and susceptible tomato cultivars. *Phytopathology.* **89**:1233-9.
6. **Genin S, Brito B, Denny TP, Boucher C.** 2005. Control of the *Ralstonia solanacearum* Type III secretion system (Hrp) genes by the global virulence regulator PhcA. *FEBS Lett.* **579**:2077-81.
7. **Jacobs JM, Babujee L, Meng F, Milling A, Allen C.** 2012. The *in planta* transcriptome of *Ralstonia solanacearum*: conserved physiological and virulence strategies during bacterial wilt of tomato. *MBio.* **3**.
8. **Monteiro F, Genin S, vanDijk I, Valls M.** 2012. A luminescent reporter evidences active expression of *Ralstonia solanacearum* type III secretion system genes throughout plant infection. *Microbiology.* **158**:2107-16.
9. **Bhatt G, Denny TP.** 2004. *Ralstonia solanacearum* iron scavenging by the siderophore staphyloferrin B is controlled by PhcA, the global virulence regulator. *J Bacteriol.* **186**:7896-904.
10. **Flavier AB, Schell MA, Denny TP.** 1998. An RpoS (sigmaS) homologue regulates acylhomoserine lactone-dependent autoinduction in *Ralstonia solanacearum*. *Mol Microbiol.* **28**:475-86.
11. **Schell MA, Denny TP, Huang J.** 1994. Extracellular virulence factors of *Pseudomonas solanacearum*: role in disease and regulation of expression. In *Molecular Mechanisms of Bacterial Virulence*, ed. C Kado, J Crosa, pp. 311–324. Dordrecht: Kluwer
12. **Schneider P, Jacobs JM, Neres J, Aldrich CA, Allen C, Nett M, et al.** 2009. The global virulence regulators VsrAD and PhcA control secondary metabolism in the plant pathogen *Ralstonia solanacearum*. *ChemBioChem.* **10**.
13. **Kang Y, Saile E, Schell MA, Denny TP.** 1999. Quantitative immunofluorescence of regulated eps gene expression in single cells of *Ralstonia solanacearum*. *Appl Environ Microbiol.* **65**:2356-62.
